# Supplementary material for: Chemical profiling of surviving cancer cells using ToF-SIMS and MCR analysis discriminates cell components
Source: Royal Society of Chemistry journal article supplement (doi:10.1039/d4ay02238f), 2025-01-01

**Supplementary information**  
**Chemical Profiling of Surviving Cancer Cells Using TOF-SIMS and MCR Analysis**  
**Discriminates Cell Components**

Auraya Manaprasertsak<sup>a,b,c</sup>, Robin Rydbergh<sup>d</sup>, Qicheng Wu<sup>a,b,c</sup>, Maria Slyusarenko<sup>a,b,c</sup>,  
Christopher Carroll<sup>a,b,c</sup>, Sarah R. Amend<sup>e</sup>, Sofie Mohlin<sup>b,c,f</sup>, Kenneth J. Pienta<sup>e</sup>, Per Malmberg<sup>d</sup>,  
and Emma U. Hammarlund<sup>a,b,c</sup>

<sup>a</sup>Department of Experimental Medical Science, Lund University, Lund, Sweden

<sup>b</sup>Lund University Cancer Center, Lund University, Lund, Sweden.

<sup>c</sup>Lund Stem Cell Center, Lund University, Lund, Sweden.

<sup>d</sup>Department of Chemistry and Chemical Engineering, Chalmers University of Technology, Gothenburg, Sweden.

<sup>e</sup>The Cancer Ecology Center, Brady Urological Institute, Johns Hopkins School of Medicine, Baltimore, MD, USA.

<sup>f</sup>Division of Pediatrics, Department of Clinical Sciences, Lund University, Lund, Sweden.

**Contents:**

**Supplementary methods**

Seahorse assay

**Supplementary tables**

**Table S1.** The 20 highest loadings from 6 factors of MCR analysis from negative ion image of the mixed untreated and surviving cancer cells sample.

**Supplementary Discussion**

Seahorse assay

**Figure S1.** The overlay spectra of untreated cancer cells (blue) and surviving cancer cells (pink) in positive ion mode in the range of (A)  $m/z$  100-225, (B)  $m/z$  225-350, (C)  $m/z$  350-475 and (D)  $m/z$  475-600.

**Figure S2.** The overlay spectra of untreated cancer cells (blue) and surviving cancer cells (pink) in negative ion mode in the range of (A)  $m/z$  100-225, (B)  $m/z$  225-350, (C)  $m/z$  350-475 and (D)  $m/z$  475-600.

**Figure S3.** The loading spectra from 6 factors of PCA analysis from negative ion image of the mixed untreated and surviving cancer cells sample from Figure. 6. (A) factor 1 and (B) factor 2.

**Figure S4.** The loading spectra from 6 factors of PCA analysis from negative ion image of the mixed untreated and surviving cancer cells sample from Figure. 6. (A) factor 3 and (B) factor 4.

**Figure S5.** The loading spectra from 6 factors of PCA analysis from negative ion image of the mixed untreated and surviving cancer cells sample from Figure. 6. (A) factor 5 and (B) factor 6.

**Figure S6.** The loading spectra from 6 factors of MCR analysis from negative ion image of the mixed untreated and surviving cancer cells sample from Figure. 7. (A) factor 1 and (B) factor 2.

**Figure S7.** The loading spectra from 6 factors of MCR analysis from negative ion image of the mixed untreated and surviving cancer cells sample from Figure. 7. (A) factor 3 and (B) factor 4.

**Figure S8.** The loading spectra from 6 factors of MCR analysis from negative ion image of the mixed untreated and surviving cancer cells sample from Figure. 7. (A) factor 5 and (B) factor 6.

**Figure S9.** Replicate 2. (A) Six factors (F1–F6) derived from PCA analysis of negative ion images for the mixed sample of untreated and surviving cancer cells. (B) Six factors (F1–F6) derived from MCR analysis of the same negative ion images. (C) PCA analysis, and (D) MCR analysis illustrating the overlay of cytoplasm (red), nucleus (blue), and lipid droplets (red).

**Figure S10.** Replicate 2. The loading spectra from 6 factors of PCA analysis from negative ion image of the mixed untreated and surviving cancer cells sample from Figure S9. (A) factor 1 and (B) factor 2.

**Figure S11.** Replicate 2. The loading spectra from 6 factors of PCA analysis from negative ion image of the mixed untreated and surviving cancer cells sample from Figure S9. (A) factor 3 and (B) factor 4.

**Figure S12.** Replicate 2. The loading spectra from 6 factors of PCA analysis from negative ion image of the mixed untreated and surviving cancer cells sample from Figure S9. (A) factor 5 and (B) factor 6.

**Figure S13.** Replicate 2. The loading spectra from 6 factors of MCR analysis from negative ion image of the mixed untreated and surviving cancer cells sample from Figure S9. (A) factor 1 and (B) factor 2.

**Figure S14.** Replicate 2. The loading spectra from 6 factors of MCR analysis from negative ion image of the mixed untreated and surviving cancer cells sample from Figure S9. (A) factor 3 and (B) factor 4.

**Figure S15.** Replicate 2. The loading spectra from 6 factors of MCR analysis from negative ion image of the mixed untreated and surviving cancer cells sample from Figure S9. (A) factor 5 and (B) factor 6.

**Figure S16.** Replicate 3. (A) Six factors (F1–F6) derived from PCA analysis of negative ion images for the mixed sample of untreated and surviving cancer cells. (B) Six factors (F1–F6) derived from MCR analysis of the same negative ion images. (C) PCA analysis, and (D) MCR analysis illustrating the overlay of cytoplasm (red), nucleus (blue), and lipid droplets (red).

**Figure S17.** Replicate 3. The loading spectra from 6 factors of PCA analysis from negative ion image of the mixed untreated and surviving cancer cells sample from Figure S16. (A) factor 1 and (B) factor 2.

**Figure S18.** Replicate 3. The loading spectra from 6 factors of PCA analysis from negative ion image of the mixed untreated and surviving cancer cells sample from Figure S16. (A) factor 3 and (B) factor 4.

**Figure S19.** Replicate 3. The loading spectra from 6 factors of PCA analysis from negative ion image of the mixed untreated and surviving cancer cells sample from Figure S16. (A) factor 5 and (B) factor 6.

**Figure S20.** Replicate 3. The loading spectra from 6 factors of MCR analysis from negative ion image of the mixed untreated and surviving cancer cells sample from Figure S16. (A) factor 1 and (B) factor 2.

**Figure S21.** Replicate 3. The loading spectra from 6 factors of MCR analysis from negative ion image of the mixed untreated and surviving cancer cells sample from Figure S16. (A) factor 3 and (B) factor 4.

**Figure S22.** Replicate 3. The loading spectra from 6 factors of MCR analysis from negative ion image of the mixed untreated and surviving cancer cells sample from Figure S16. (A) factor 5 and (B) factor 6.

**Figure S23.** The measurement of oxygen consumption rate (OCR) of untreated and surviving cancer cells over time using Seahorse assay.

## **Supplementary methods**

### **Seahorse assay**

The oxygen consumption rate (OCR) of untreated and cisplatin-surviving cancer cells was measured using the Seahorse XF Analyzer (Agilent, USA). Cells were seeded in Seahorse XF 96-well plates at 20,000–30,000 cells per well, incubated overnight in growth medium, and then switched to serum-free Seahorse XF Assay Medium for 1 hour at 37°C without CO<sub>2</sub>. Basal OCR was recorded, followed by sequential injections of oligomycin (2–5 µM) to assess ATP-linked respiration, FCCP (2 µM) for maximal respiratory capacity, and rotenone/antimycin A (1 µM each) for non-mitochondrial OCR. Data were collected with Seahorse XF Wave software to calculate basal OCR, ATP-linked OCR, maximal OCR, non-mitochondrial OCR, and spare respiratory capacity (maximal OCR minus basal OCR). Statistical analyses were performed to compare untreated and surviving cells' OCR profiles.

# Supplementary tables

**Table S1.** The 20 highest loadings from 6 factors of MCR analysis from negative ion image of the mixed untreated and surviving cancer cells sample.

|     | Factor 1   |                 | Factor 2   |                 | Factor 3   |                 |
|-----|------------|-----------------|------------|-----------------|------------|-----------------|
| No. | <i>m/z</i> | Loadings (a.u.) | <i>m/z</i> | Loadings (a.u.) | <i>m/z</i> | Loadings (a.u.) |
| 1   | 158.9893   | 0.013           | 72.0769    | 0.007           | 45.0188    | 0.017           |
| 2   | 78.9967    | 0.012           | 141.1099   | 0.007           | 100.0768   | 0.015           |
| 3   | 62.9890    | 0.012           | 42.0166    | 0.007           | 71.0272    | 0.015           |
| 4   | 180.9790   | 0.011           | 82.1128    | 0.007           | 73.0107    | 0.015           |
| 5   | 260.9582   | 0.011           | 155.1281   | 0.006           | 87.0422    | 0.014           |
| 6   | 198.9893   | 0.009           | 101.1138   | 0.006           | 59.0514    | 0.014           |
| 7   | 97.0071    | 0.009           | 129.1533   | 0.006           | 55.0436    | 0.013           |
| 8   | 276.9321   | 0.009           | 130.0964   | 0.006           | 43.0448    | 0.012           |
| 9   | 134.1003   | 0.008           | 115.0858   | 0.006           | 69.0114    | 0.012           |
| 10  | 90.0480    | 0.007           | 26.0065    | 0.006           | 41.0072    | 0.010           |
| 11  | 182.9677   | 0.006           | 156.1238   | 0.006           | 99.0467    | 0.009           |
| 12  | 127.9952   | 0.006           | 145.1199   | 0.006           | 113.0648   | 0.008           |
| 13  | 214.9729   | 0.006           | 56.0740    | 0.005           | 85.0715    | 0.008           |
| 14  | 164.9651   | 0.006           | 167.1374   | 0.005           | 83.0463    | 0.008           |
| 15  | 117.0783   | 0.006           | 40.0394    | 0.005           | 71.0633    | 0.008           |
| 16  | 102.9953   | 0.006           | 170.1455   | 0.005           | 57.0166    | 0.007           |
| 17  | 80.9959    | 0.005           | 142.1141   | 0.005           | 115.0293   | 0.007           |
| 18  | 244.9407   | 0.005           | 44.0353    | 0.005           | 58.0233    | 0.007           |
| 19  | 95.9871    | 0.005           | 70.0596    | 0.005           | 53.0132    | 0.007           |
| 20  | 223.9682   | 0.005           | 71.0633    | 0.005           | 112.0628   | 0.006           |
|     | Factor 4   |                 | Factor 5   |                 | Factor 6   |                 |
| No. | <i>m/z</i> | Loadings (a.u.) | <i>m/z</i> | Loadings (a.u.) | <i>m/z</i> | Loadings (a.u.) |
| 1   | 101.9657   | 0.024           | 42.0166    | 0.007           | 15.9896    | 0.035           |
| 2   | 177.9684   | 0.023           | 26.0065    | 0.007           | 75.9933    | 0.031           |
| 3   | 114.9687   | 0.022           | 91.0235    | 0.006           | 77.0053    | 0.030           |
| 4   | 129.1081   | 0.022           | 40.0394    | 0.006           | 59.9875    | 0.028           |
| 5   | 163.9661   | 0.021           | 44.0353    | 0.005           | 136.9862   | 0.023           |
| 6   | 133.9950   | 0.020           | 41.0306    | 0.005           | 135.9761   | 0.023           |
| 7   | 156.9615   | 0.020           | 71.0274    | 0.005           | 178.9643   | 0.018           |
| 8   | 63.9772    | 0.020           | 107.0234   | 0.005           | 17.0024    | 0.017           |
| 9   | 121.9908   | 0.019           | 25.0095    | 0.005           | 60.9861    | 0.016           |
| 10  | 94.9498    | 0.018           | 65.0401    | 0.005           | 118.9819   | 0.015           |
| 11  | 92.9474    | 0.017           | 47.0181    | 0.005           | 196.9755   | 0.015           |
| 12  | 64.9571    | 0.017           | 71.0633    | 0.004           | 77.9858    | 0.015           |

|    |          |       |         |       |          |       |
|----|----------|-------|---------|-------|----------|-------|
| 13 | 85.9663  | 0.015 | 50.0270 | 0.004 | 137.9746 | 0.013 |
| 14 | 54.9660  | 0.014 | 98.0475 | 0.004 | 238.9548 | 0.009 |
| 15 | 55.9844  | 0.013 | 66.0745 | 0.004 | 31.9942  | 0.009 |
| 16 | 43.0189  | 0.011 | 97.0818 | 0.004 | 119.9681 | 0.008 |
| 17 | 54.0089  | 0.011 | 73.0747 | 0.004 | 58.9806  | 0.008 |
| 18 | 132.9109 | 0.010 | 54.0603 | 0.004 | 61.9717  | 0.007 |
| 19 | 46.9703  | 0.010 | 66.1011 | 0.004 | 179.9646 | 0.007 |
| 20 | 73.9871  | 0.008 | 82.0615 | 0.004 | 256.9491 | 0.007 |

139  
140

## Supplementary Discussion

### Seahorse assay

**Figure S5** shows the oxygen consumption rate (OCR) of untreated and cisplatin-surviving cancer cells over time, measured by Seahorse assay. The assay includes two main conditions: baseline OCR (cells in media without inhibitors) and OCR after etomoxir treatment to inhibit fatty acid oxidation. When cells are treated with etomoxir, OCR typically decreases if the cells are relying on fatty acids as a primary fuel source. From Figure S5, untreated cells exhibited no difference between media and etomoxir condition, while the surviving cells increase OCR in the etomoxir condition. An increased OCR with etomoxir treatment could indicate that the inhibition of fatty acid oxidation could induce a stress response, activating pathways that increase mitochondrial respiration as a protective mechanism. This response might lead to a temporary boost in OCR due to cellular attempts to adapt to the metabolic restriction. The Seahorse assay consists of sequential additions of compounds to assess mitochondrial function: (A) Basal respiration measures natural OCR; (B) Oligomycin inhibits ATP synthase, with the drop in OCR reflecting ATP-linked respiration; (C) FCCP uncouples oxidative phosphorylation, with the increase in OCR indicating maximal respiratory capacity; and (D) Rotenone and Antimycin A inhibit mitochondrial respiration, with the remaining OCR representing non-mitochondrial oxygen consumption. From Figure S5, the higher oxygen consumption rate in the surviving cells compared to the untreated cells indicates a metabolic adaptation characterized by increased mitochondrial activity. This enhancement likely supports greater energy production and contributes to the cells' resistance and resilience to stress.

**Figure S1.** The overlay spectra of untreated cancer cells (blue) and surviving cancer cells (pink) in positive ion mode in the range of (A)  $m/z$  100-225, (B)  $m/z$  225-350, (C)  $m/z$  350-475 and (D)  $m/z$  475-600.

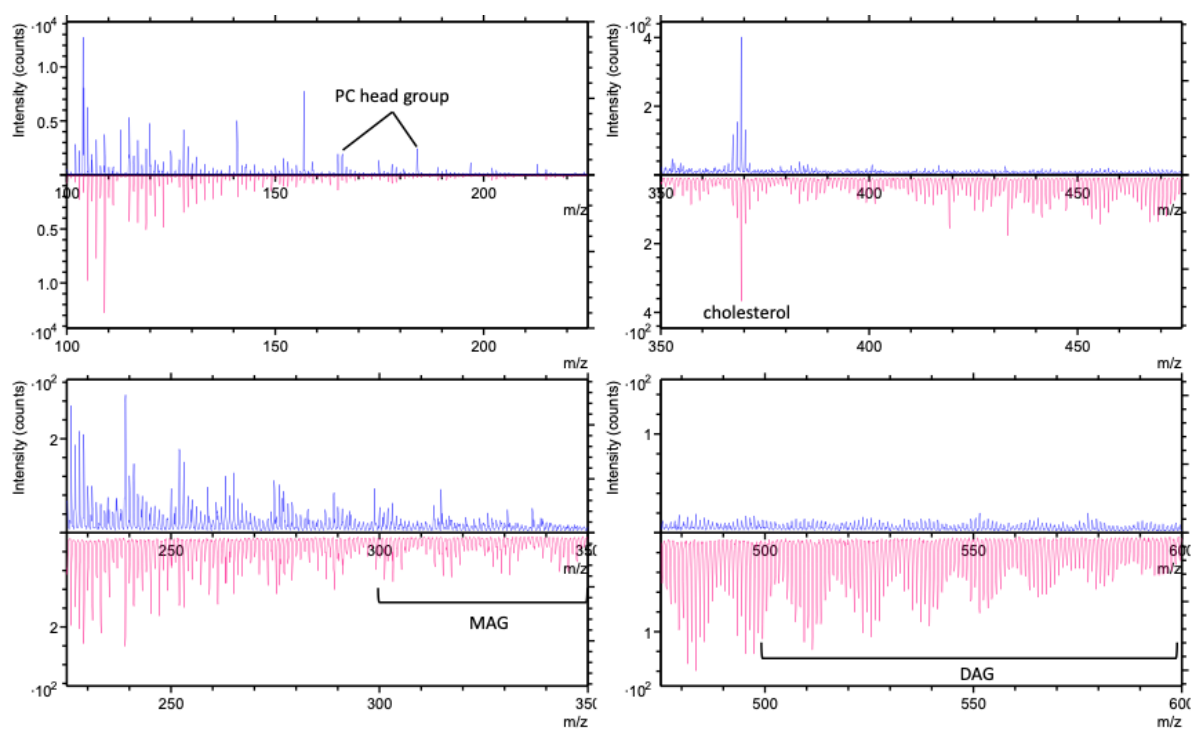



**Figure S2.** The overlay spectra of untreated cancer cells (blue) and surviving cancer cells (pink) in negative ion mode in the range of (A)  $m/z$  100-225, (B)  $m/z$  225-350, (C)  $m/z$  350-475 and (D)  $m/z$  475-600.

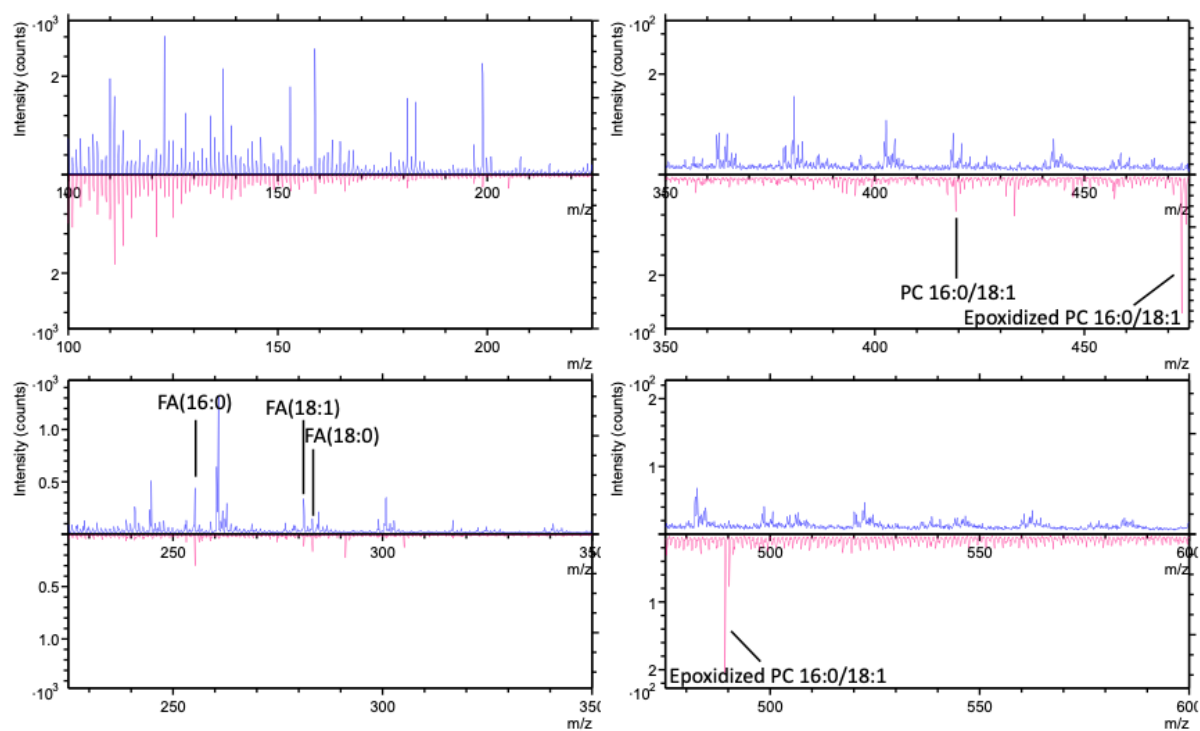

**Figure S3.** The loading spectra from 6 factors of PCA analysis from negative ion image of the mixed untreated and surviving cancer cells sample from Figure. 6. **(A)** factor 1 and **(B)** factor 2.

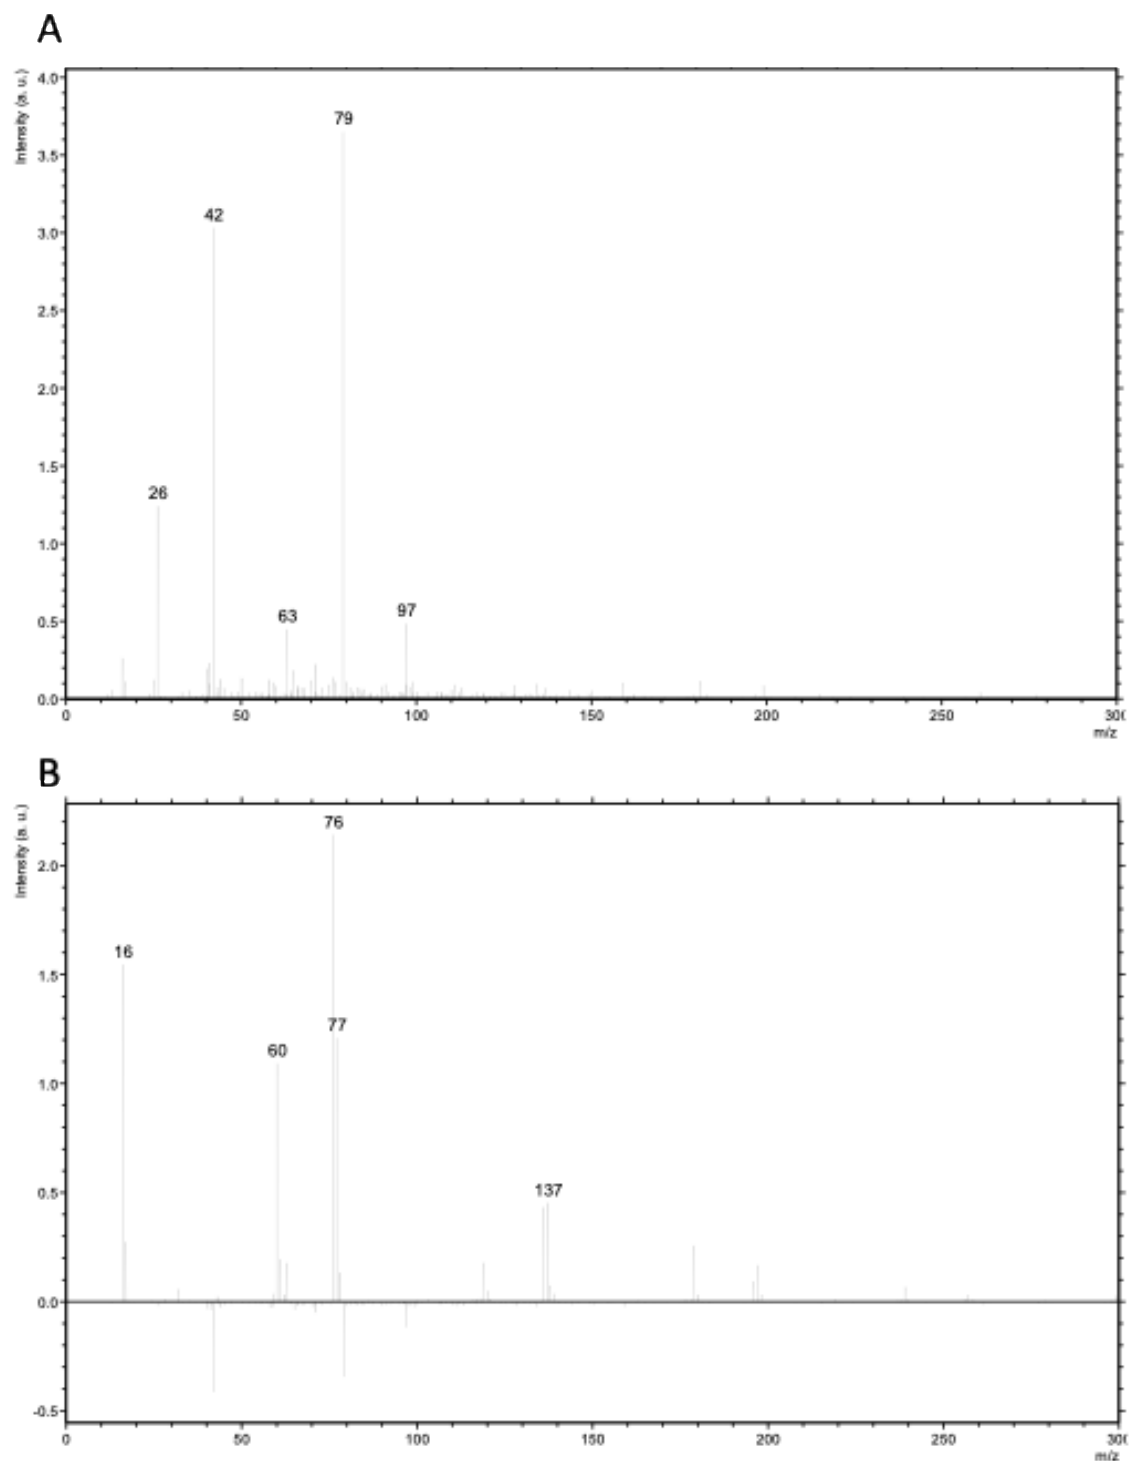

**Figure S4.** The loading spectra from 6 factors of PCA analysis from negative ion image of the mixed untreated and surviving cancer cells sample from Figure. 6. **(A)** factor 3 and **(B)** factor 4.

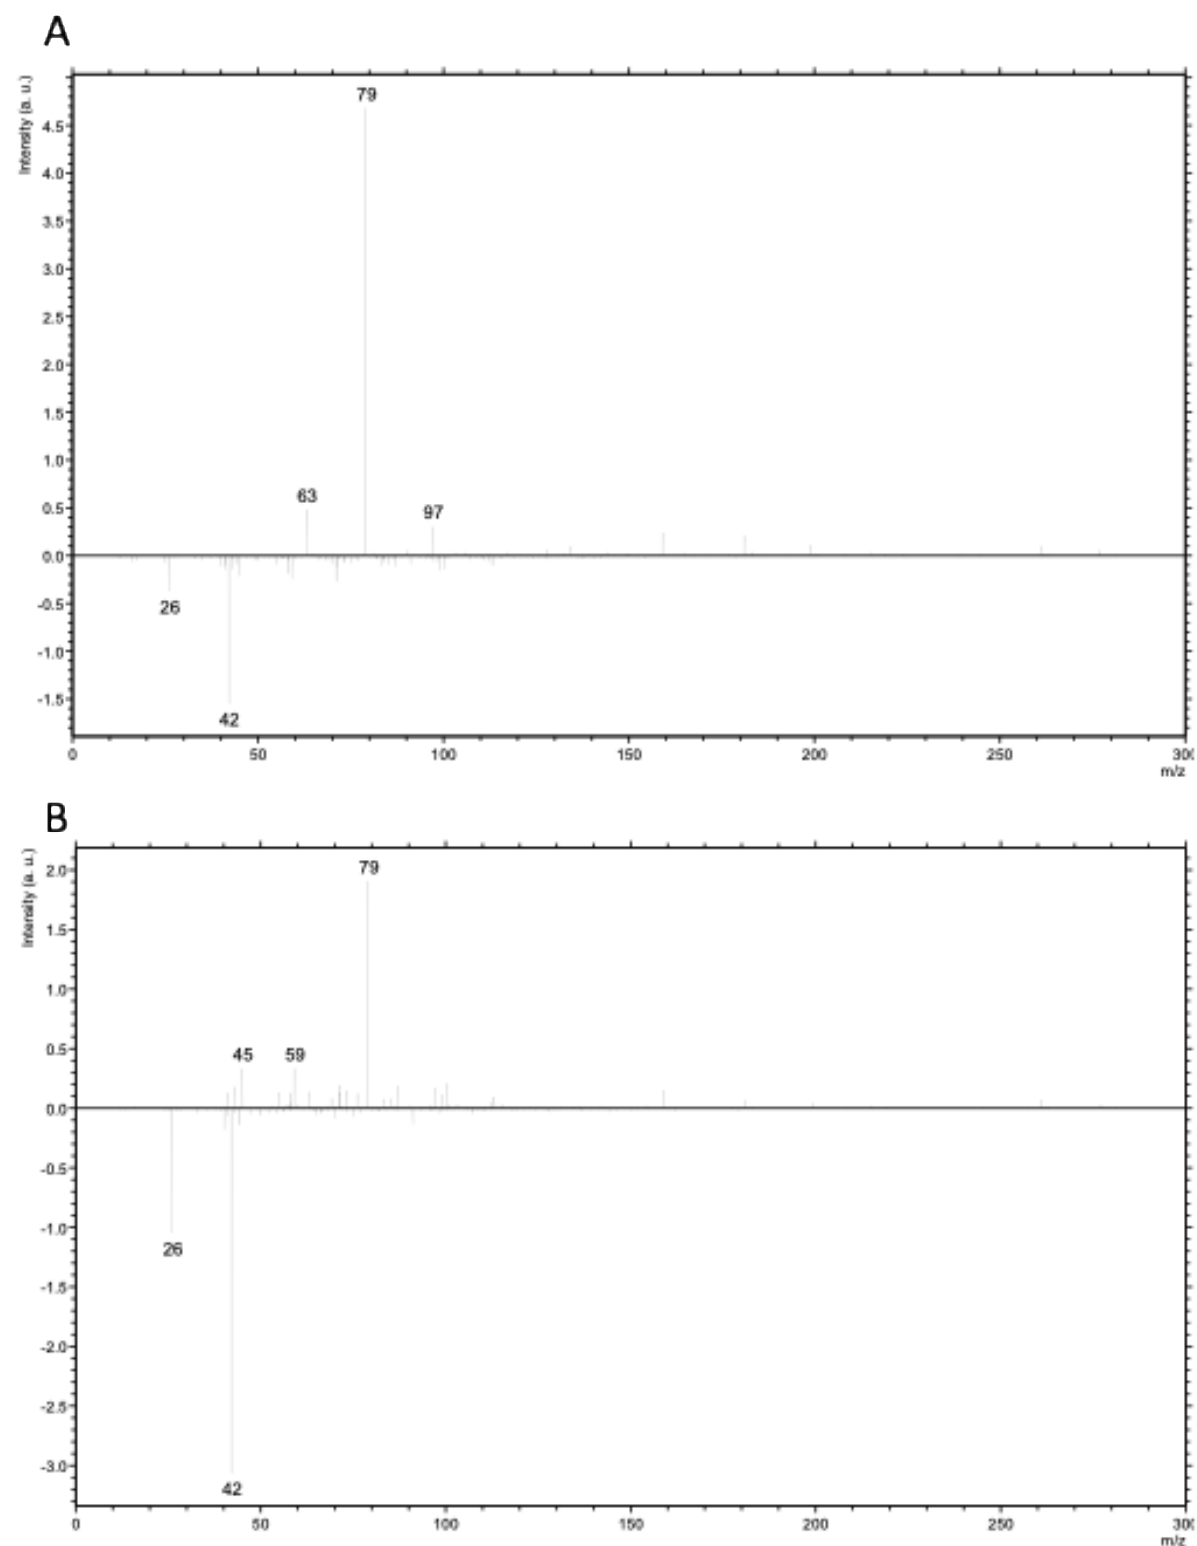

**Figure S5.** The loading spectra from 6 factors of PCA analysis from negative ion image of the mixed untreated and surviving cancer cells sample from Figure. 6. **(A)** factor 5 and **(B)** factor 6.

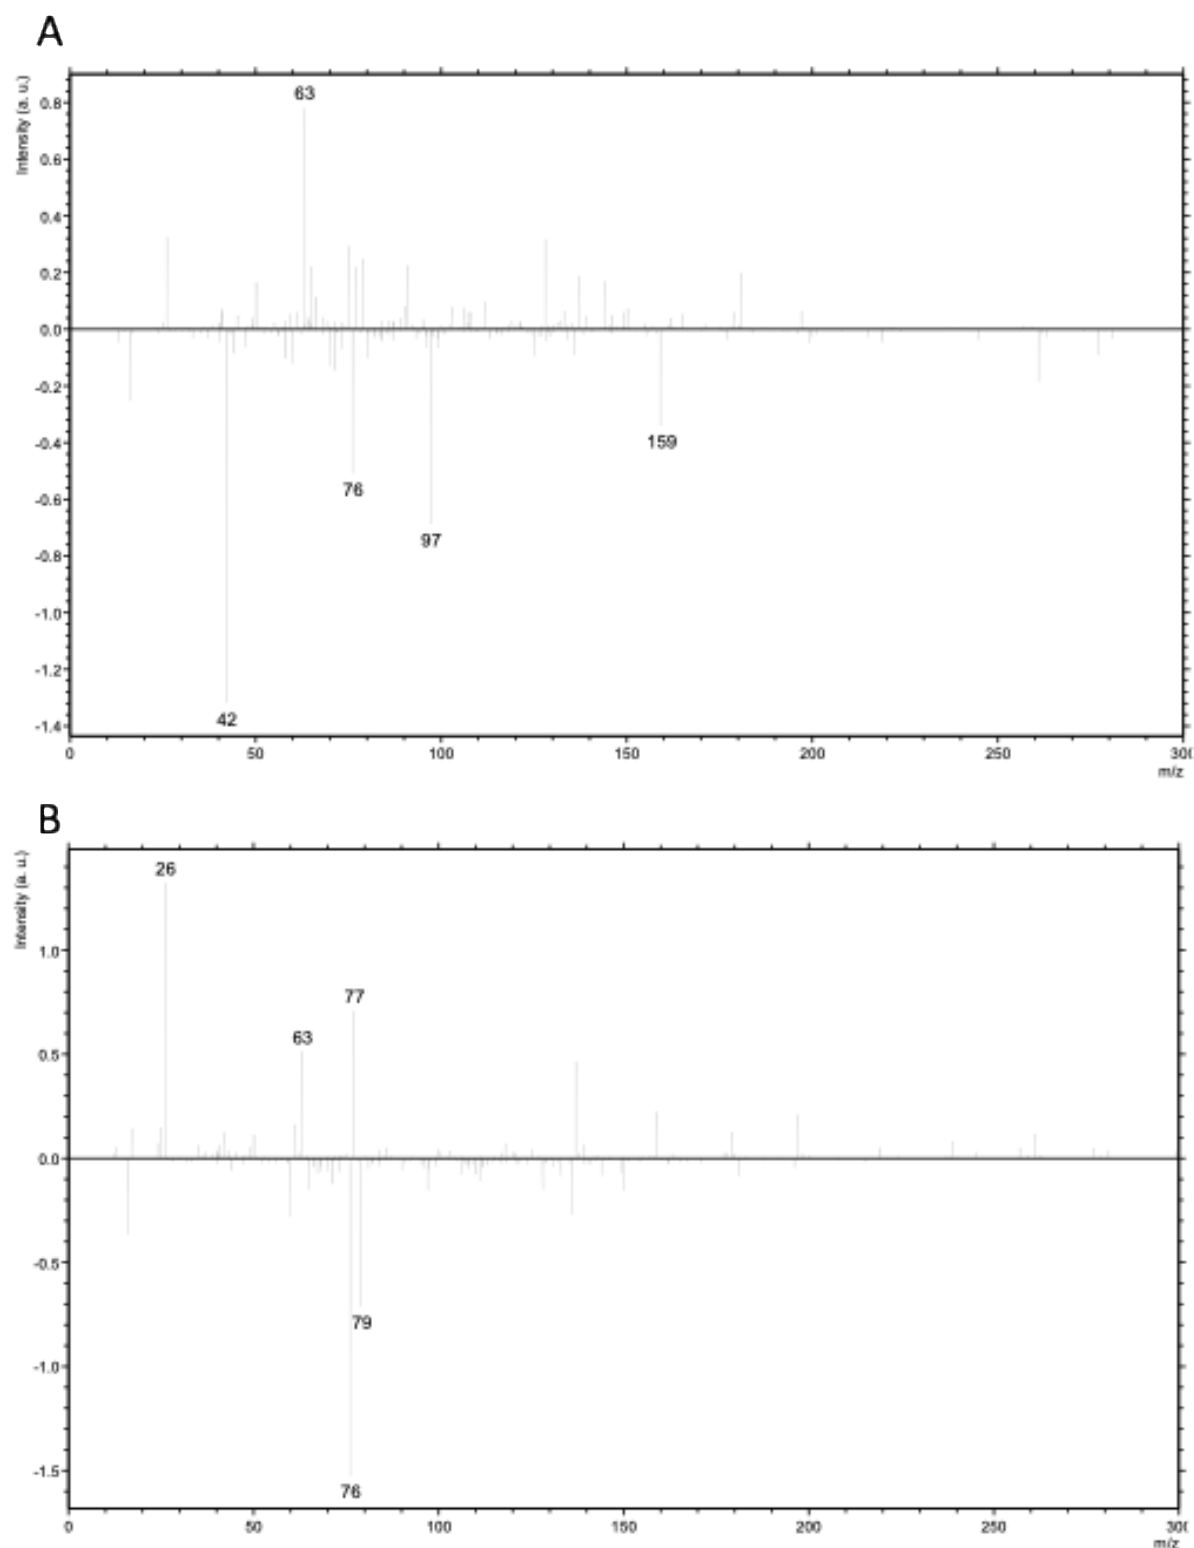

190 **Figure S6.** The loading spectra from 6 factors of MCR analysis from negative ion image of the  
191 mixed untreated and surviving cancer cells sample from Figure. 7. **(A)** factor 1 and **(B)** factor  
192 2.

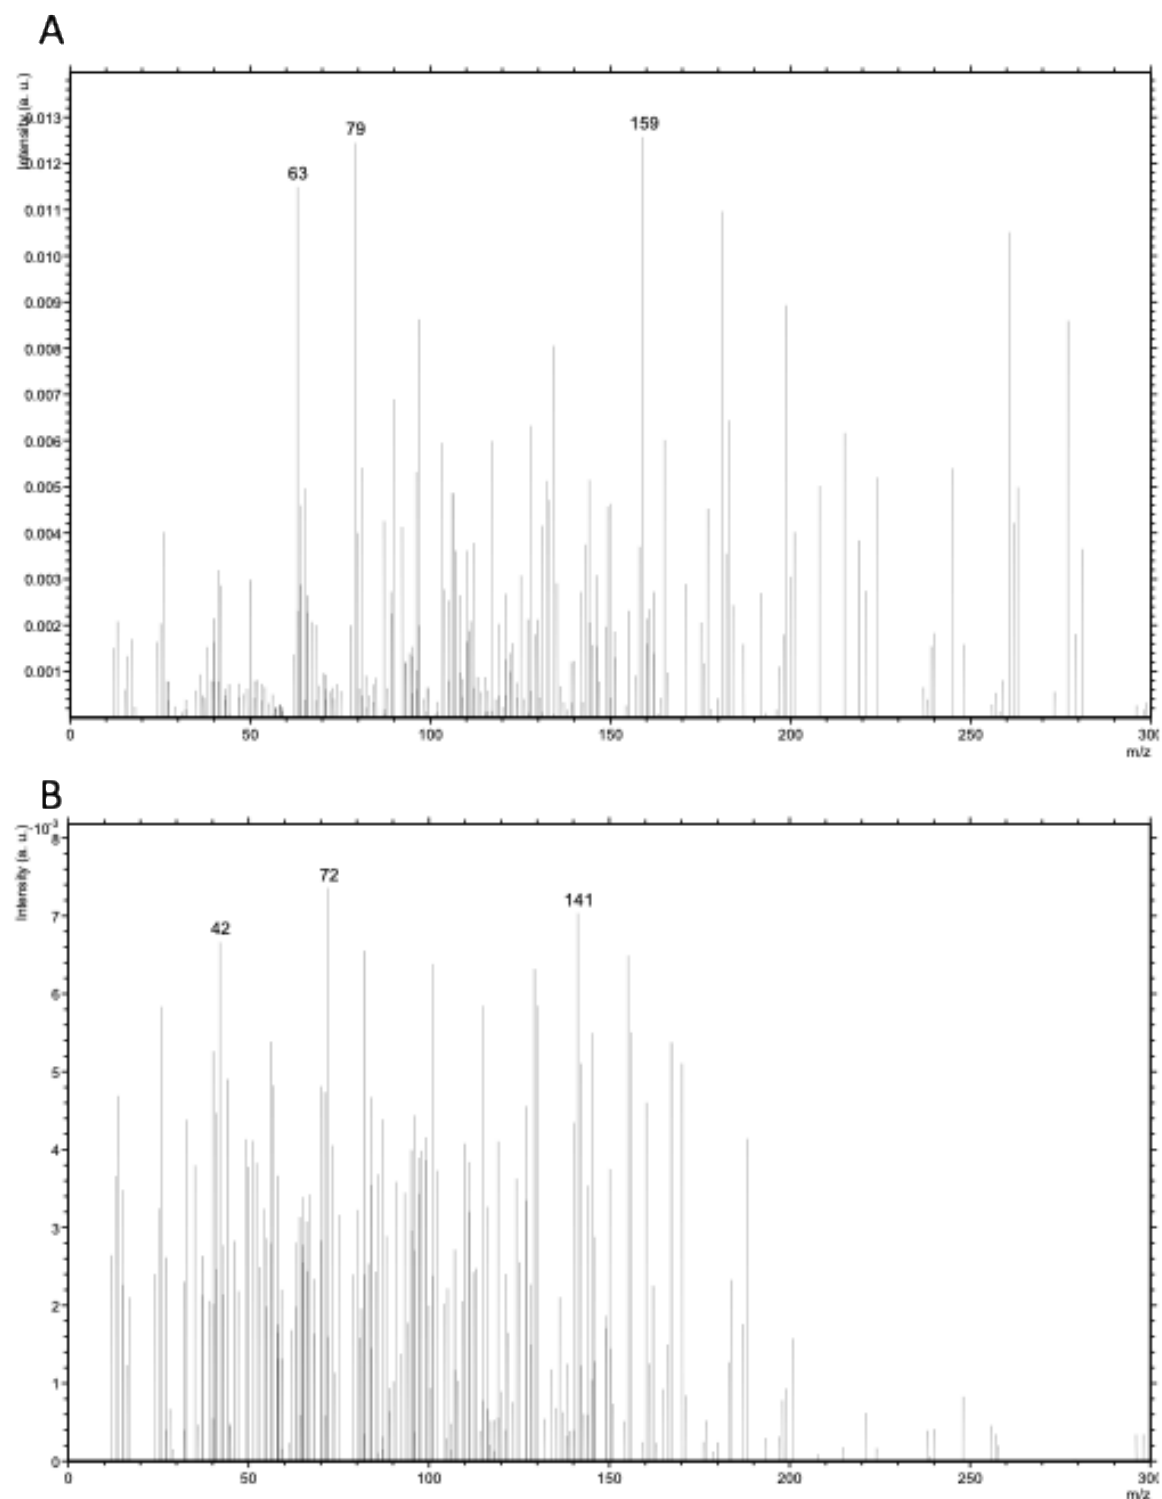

194 **Figure S7.** The loading spectra from 6 factors of MCR analysis from negative ion image of the  
 195 mixed untreated and surviving cancer cells sample from Figure. 7. **(A)** factor 3 and **(B)** factor  
 196 4.

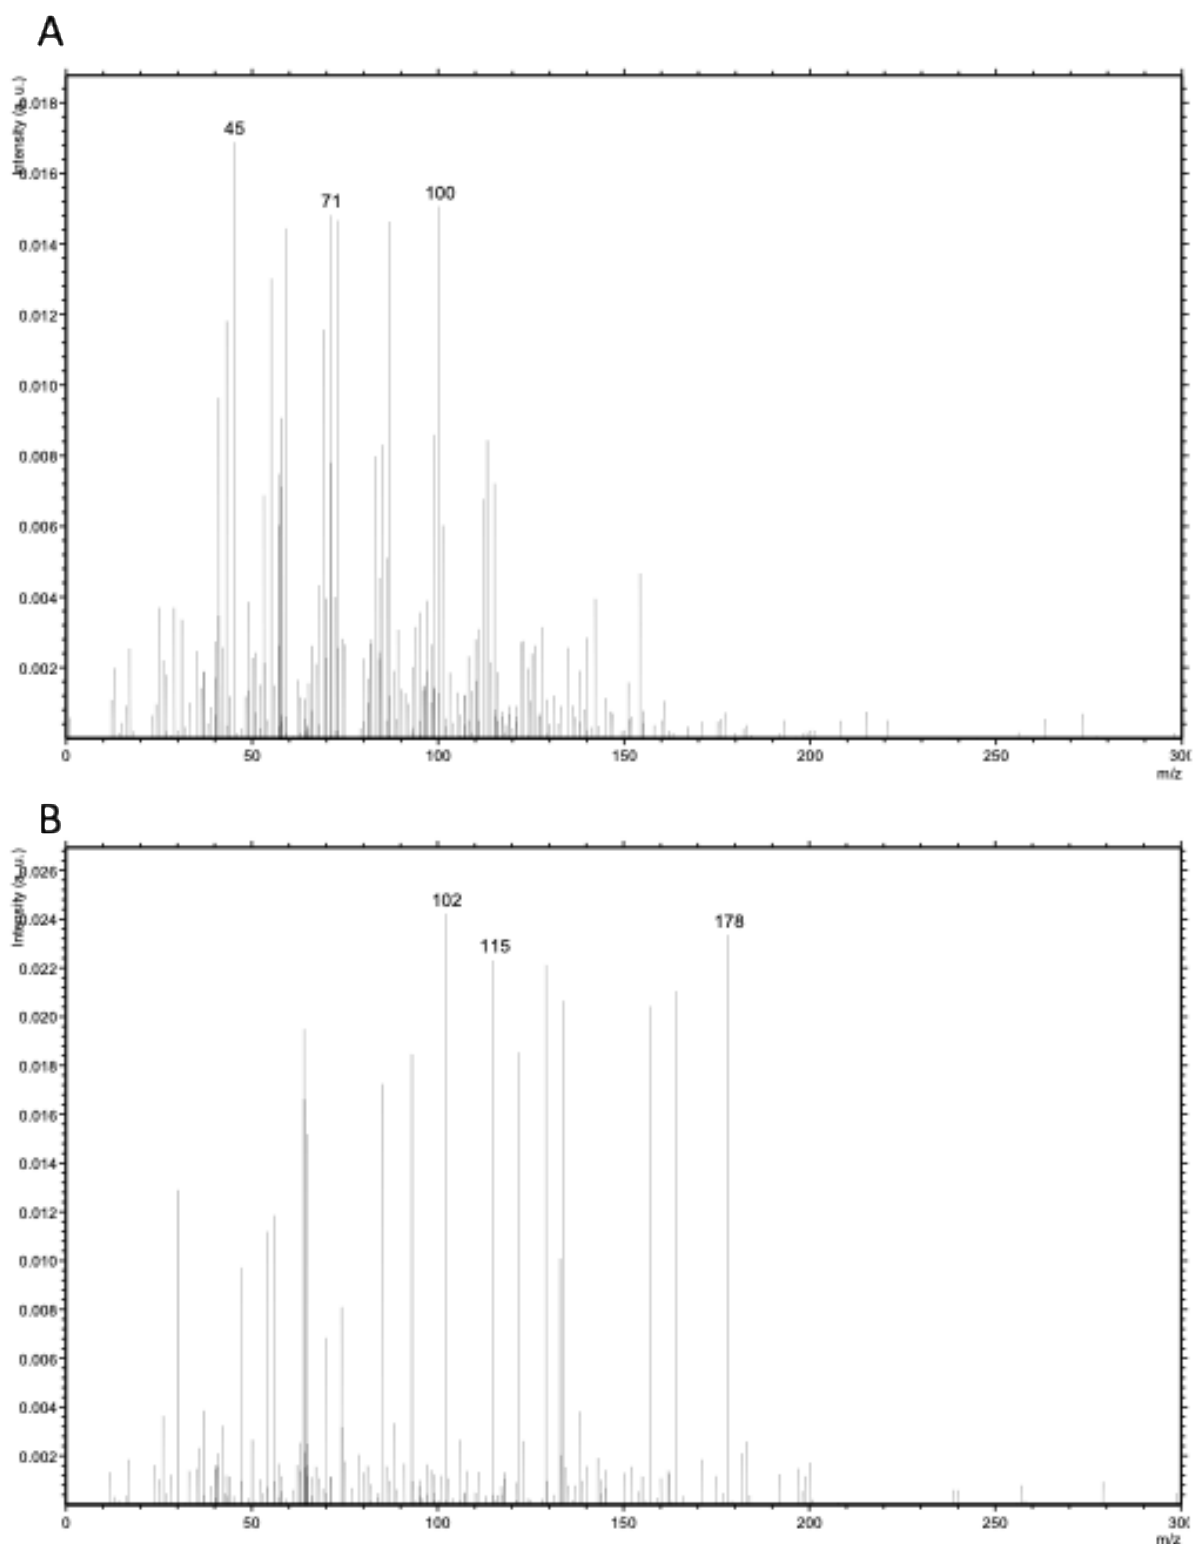

198 **Figure S8.** The loading spectra from 6 factors of MCR analysis from negative ion image of the  
 199 mixed untreated and surviving cancer cells sample from Figure. 7. **(A)** factor 5 and **(B)** factor  
 200 6.

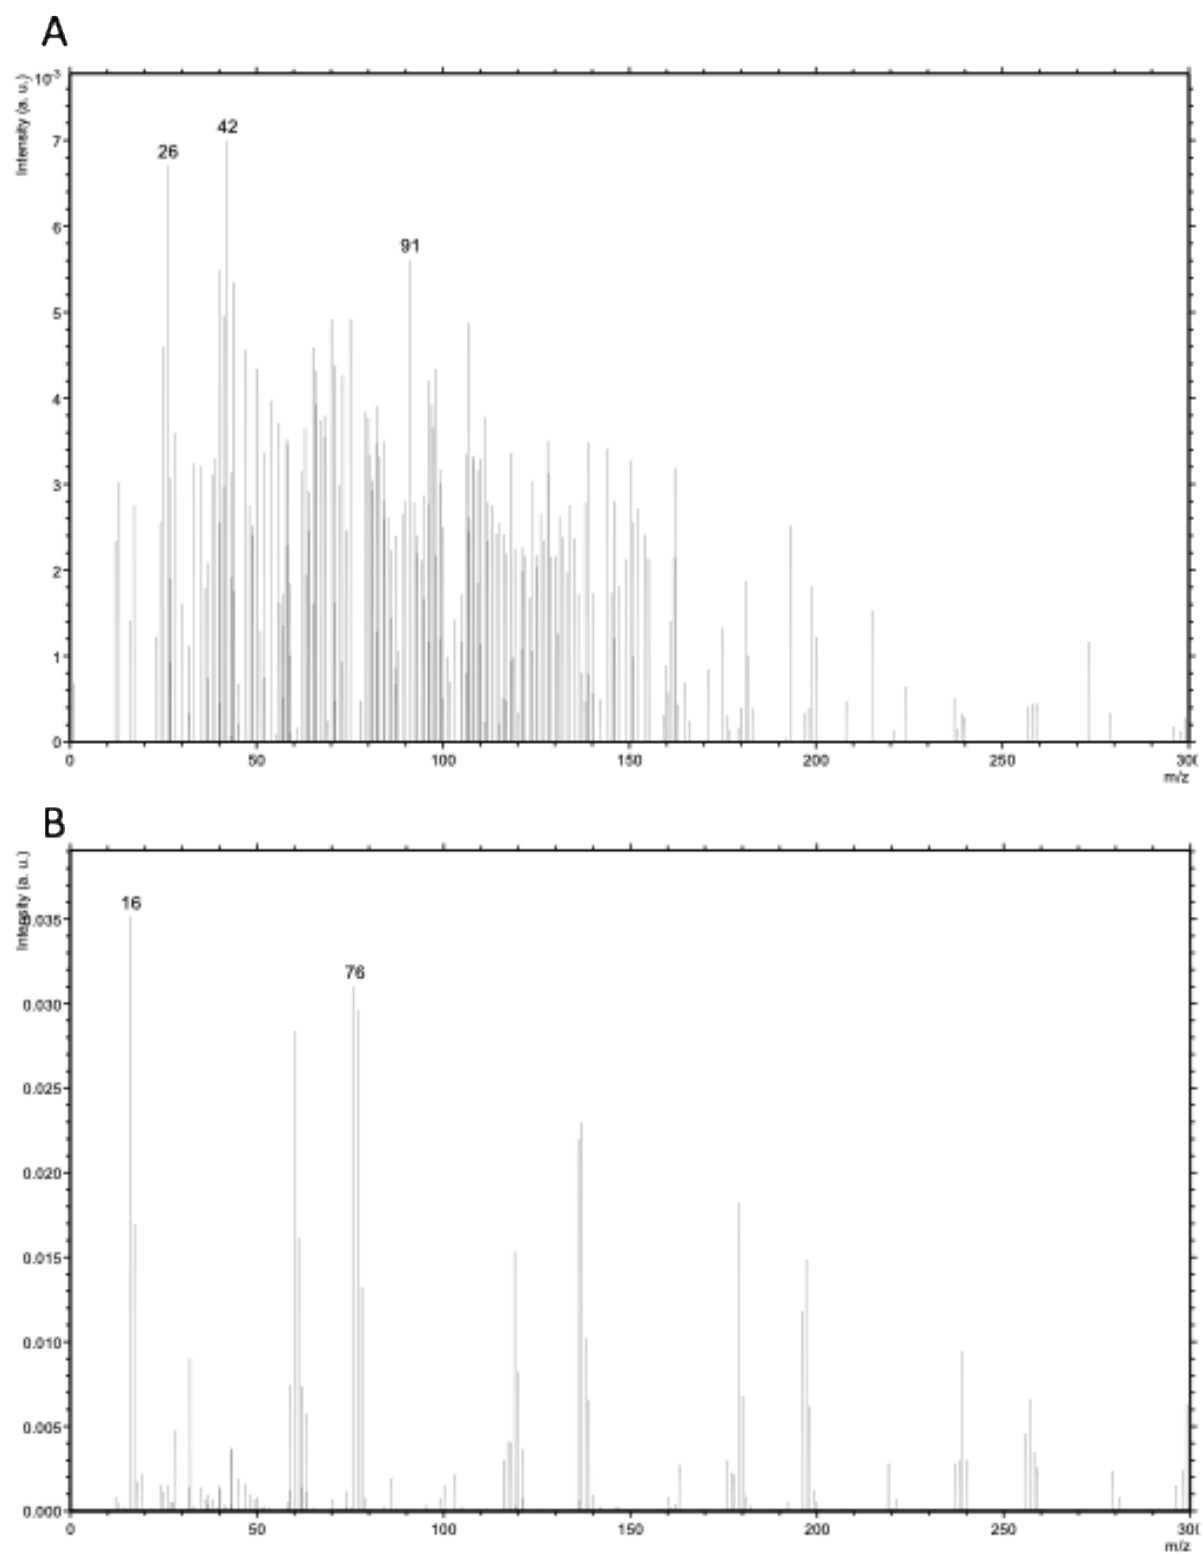

**Figure S9.** Replicate 2. **(A)** Six factors (F1–F6) derived from PCA analysis of negative ion images for the mixed sample of untreated and surviving cancer cells. **(B)** Six factors (F1–F6) derived from MCR analysis of the same negative ion images. **(C)** PCA analysis, and **(D)** MCR analysis illustrating the overlay of cytoplasm (red), nucleus (blue), and lipid droplets (red).

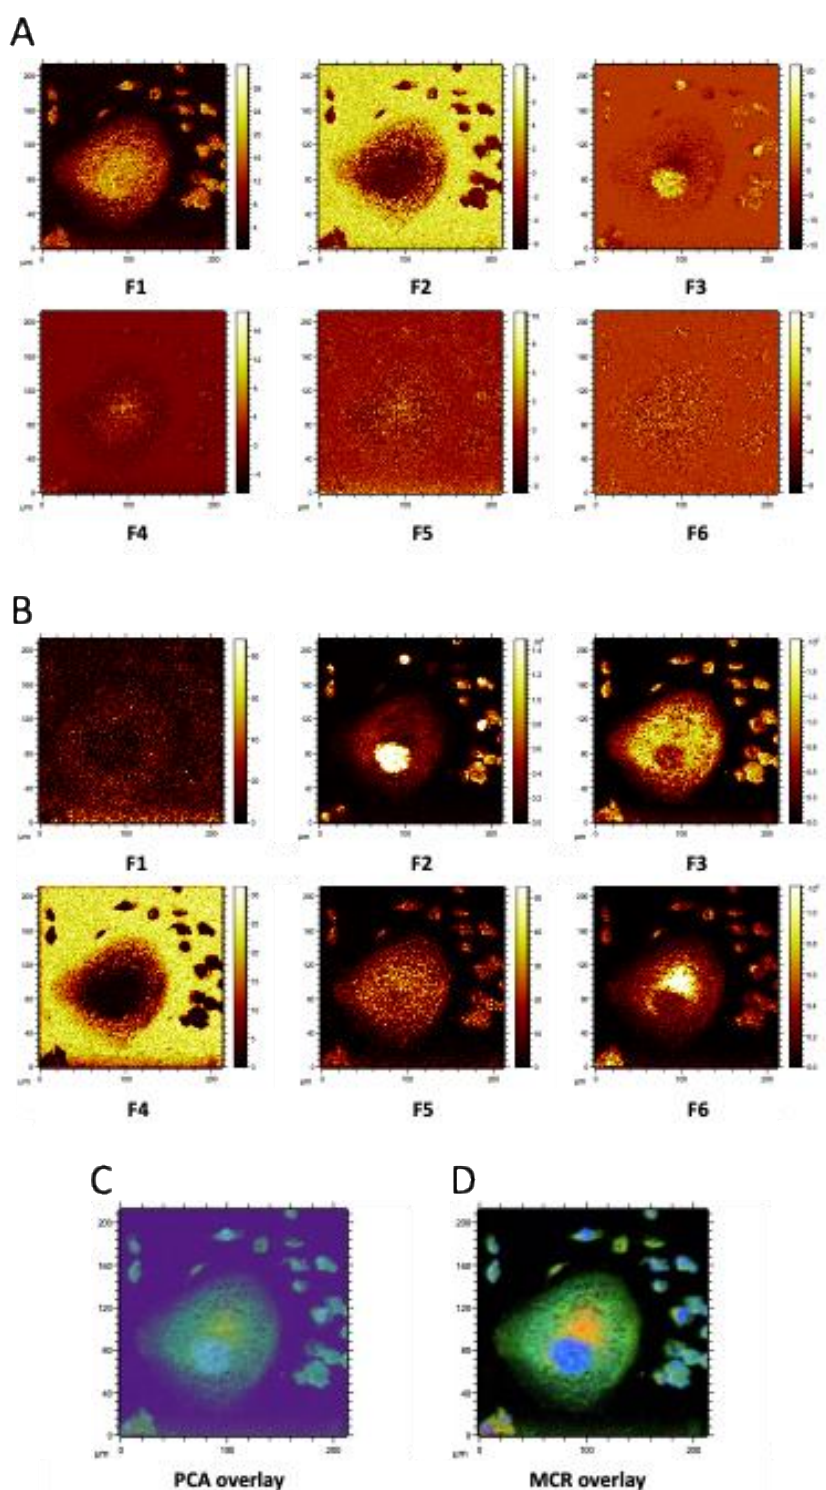



207 **Figure S10.** Replicate 2. The loading spectra from 6 factors of PCA analysis from negative ion  
208 image of the mixed untreated and surviving cancer cells sample from Figure S9. **(A)** factor 1  
209 and **(B)** factor 2.

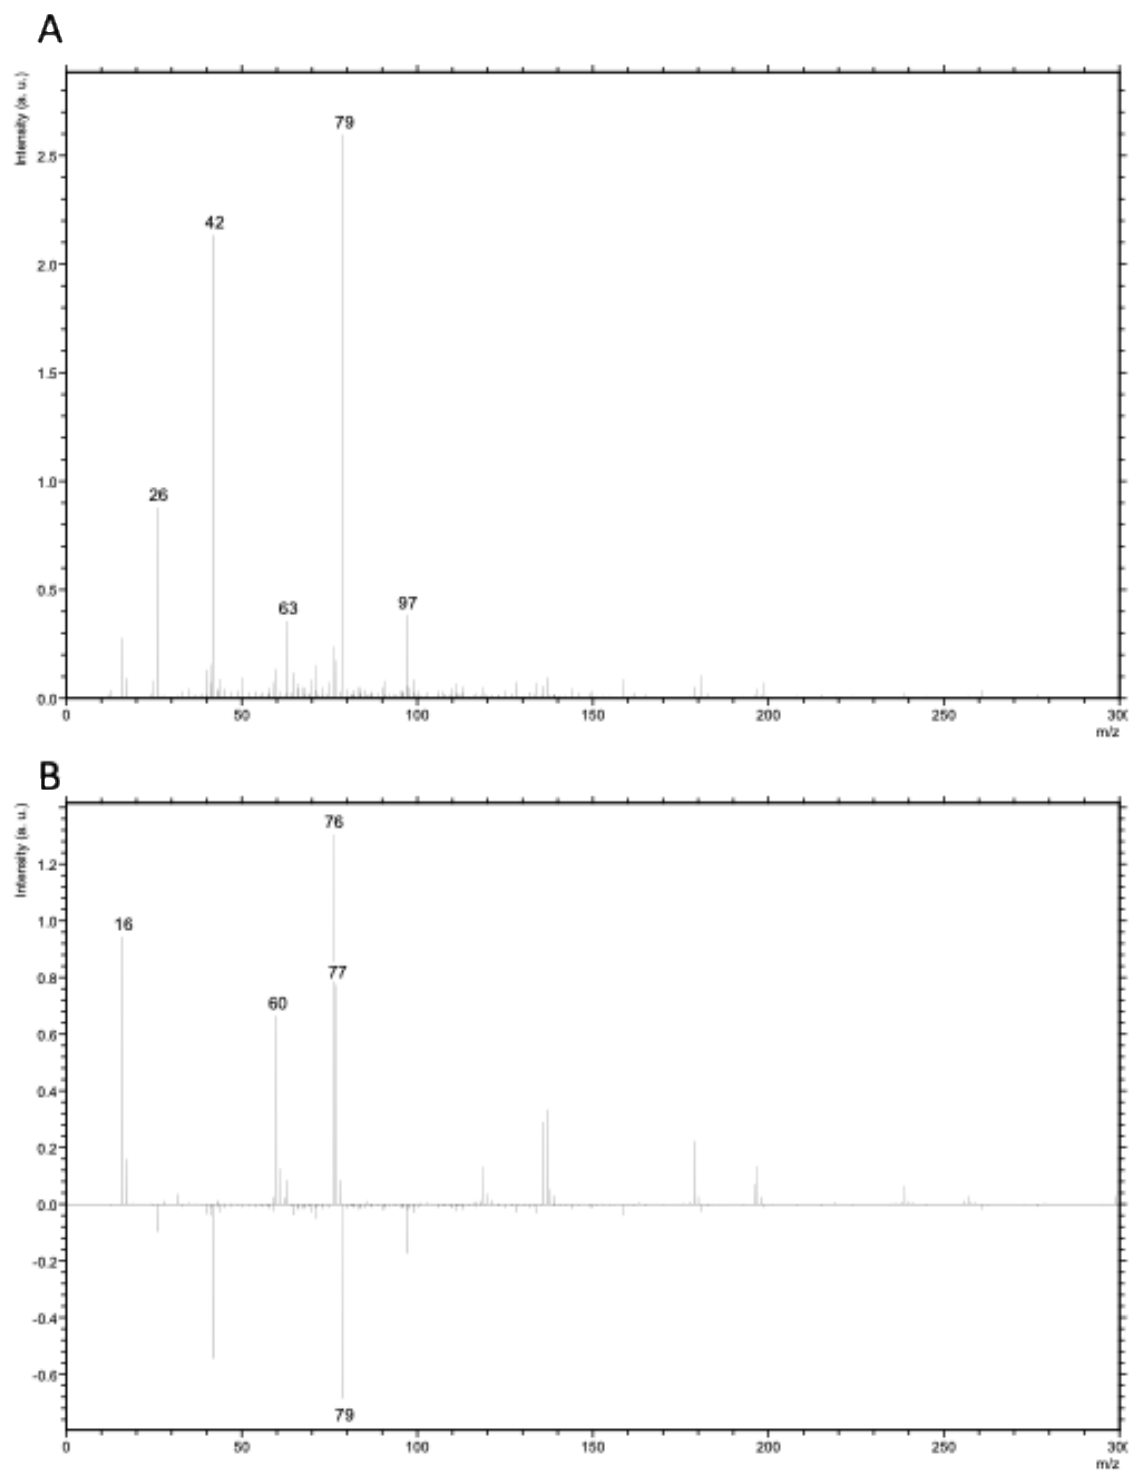

211 **Figure S11.** Replicate 2. The loading spectra from 6 factors of PCA analysis from negative ion  
212 image of the mixed untreated and surviving cancer cells sample from Figure S9. **(A)** factor 3  
213 and **(B)** factor 4.

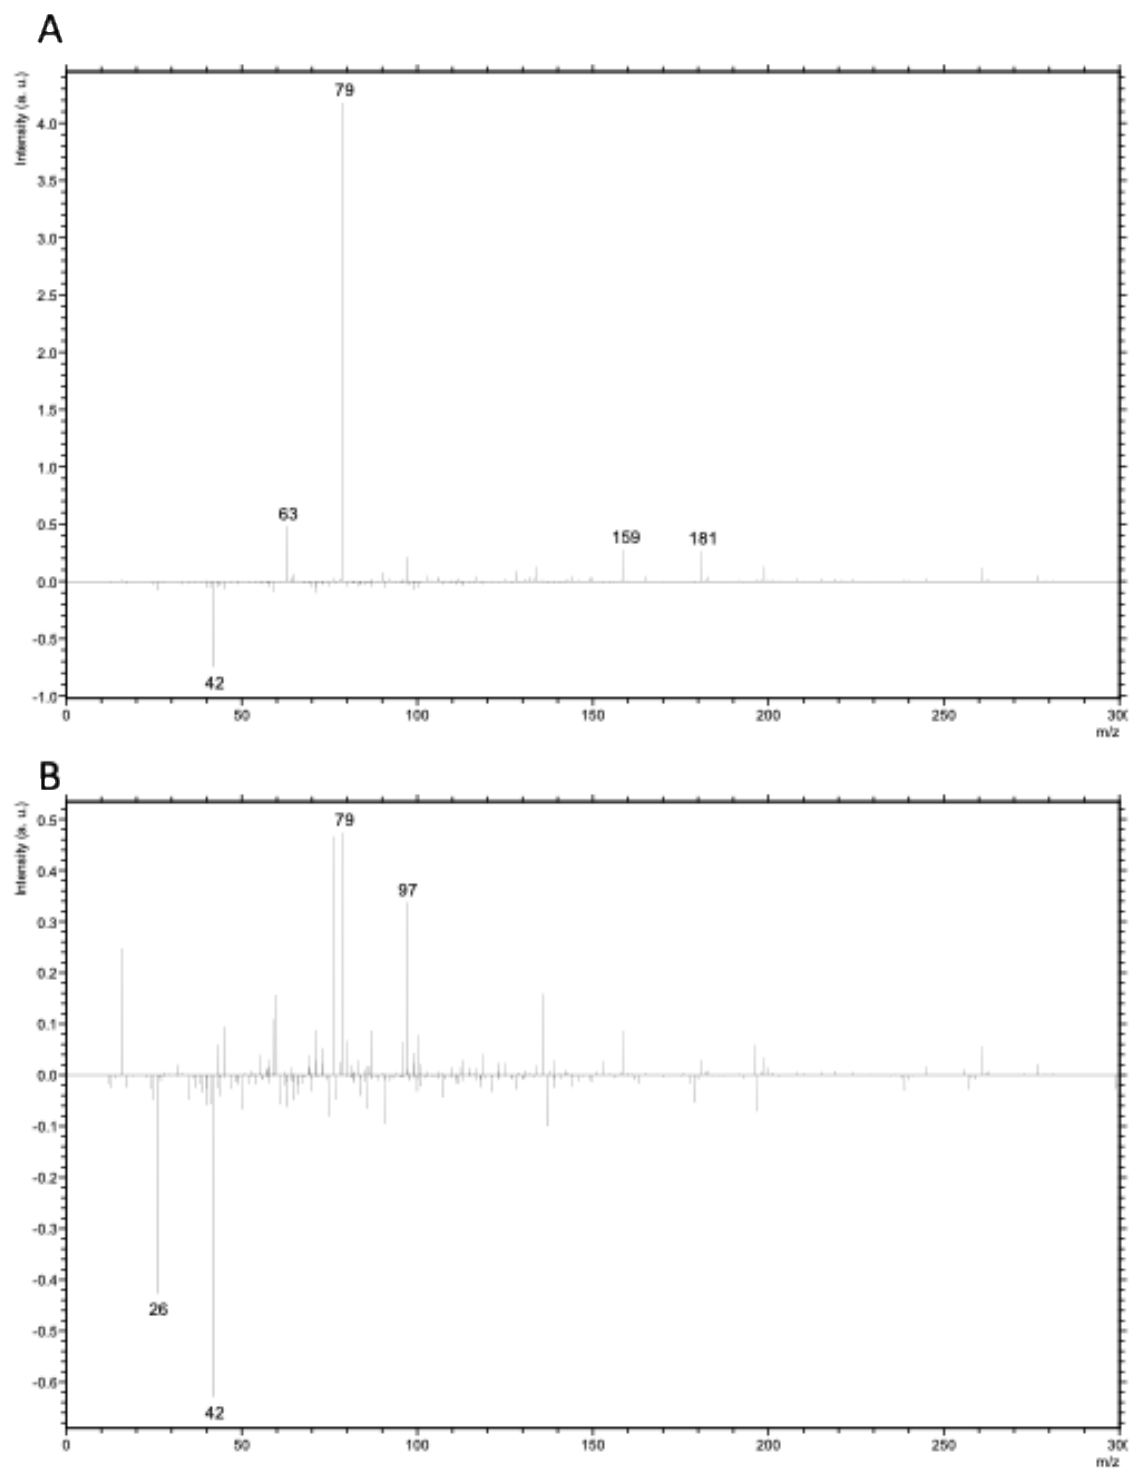

**Figure S12.** Replicate 2. The loading spectra from 6 factors of PCA analysis from negative ion image of the mixed untreated and surviving cancer cells sample from Figure S9. **(A)** factor 5 and **(B)** factor 6.

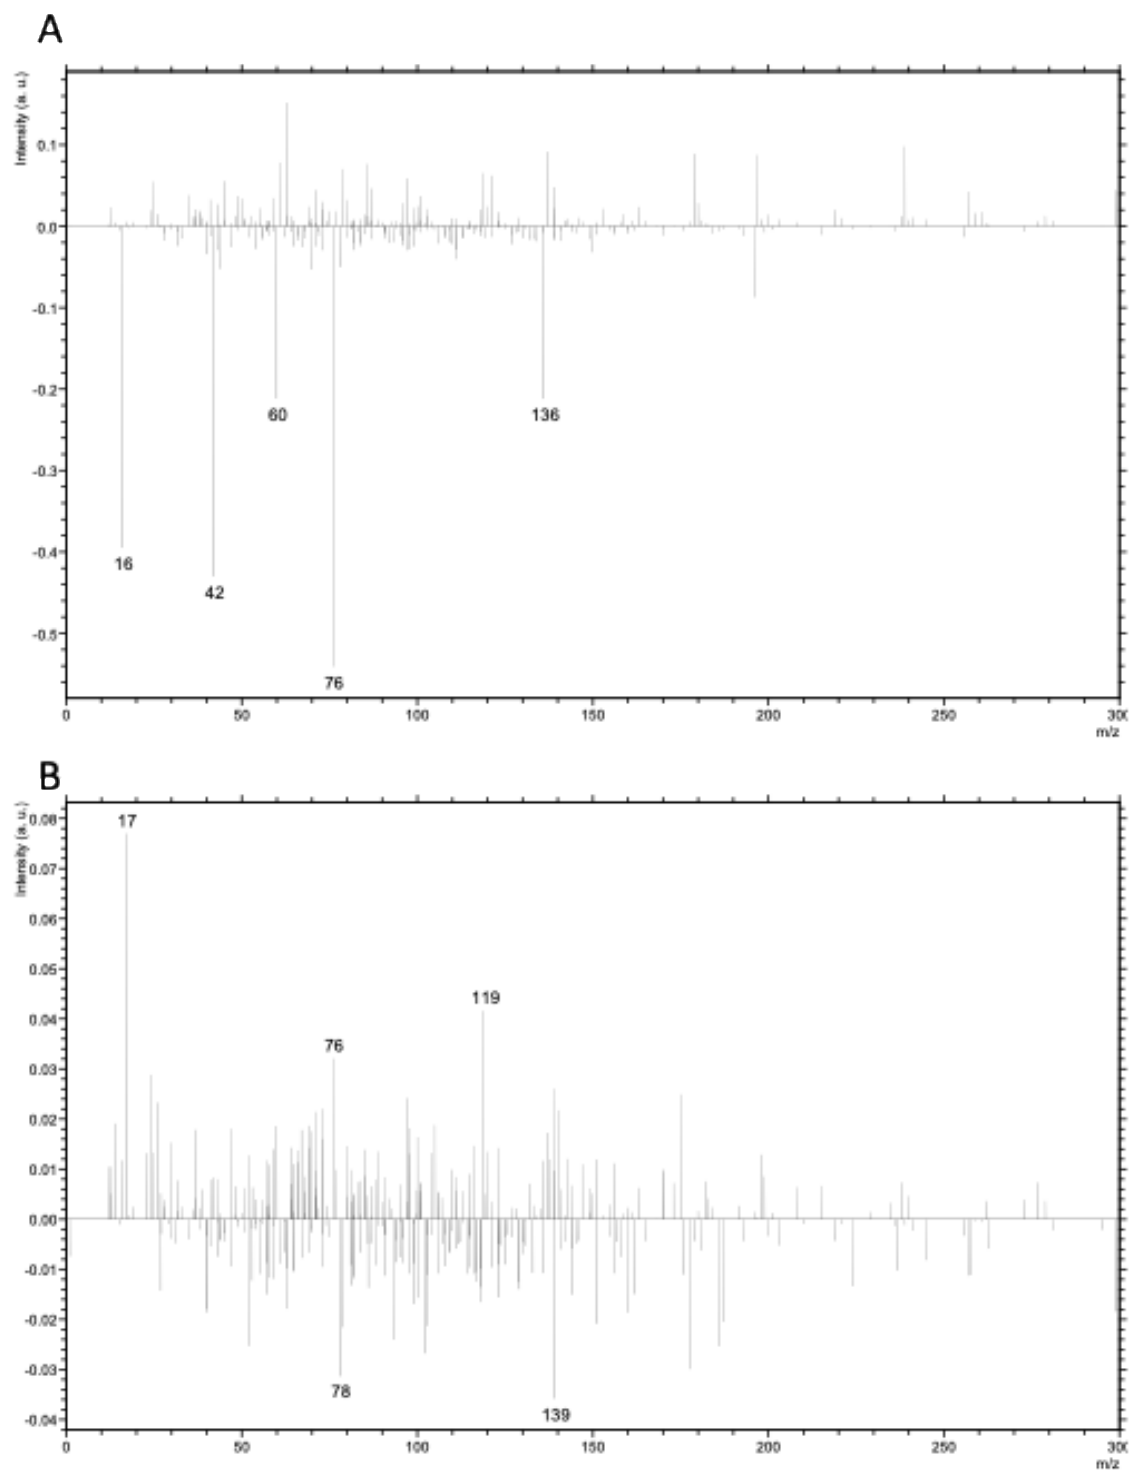

219 **Figure S13.** Replicate 2. The loading spectra from 6 factors of MCR analysis from negative  
220 ion image of the mixed untreated and surviving cancer cells sample from Figure S9. **(A)**  
221 factor 1 and **(B)** factor 2.

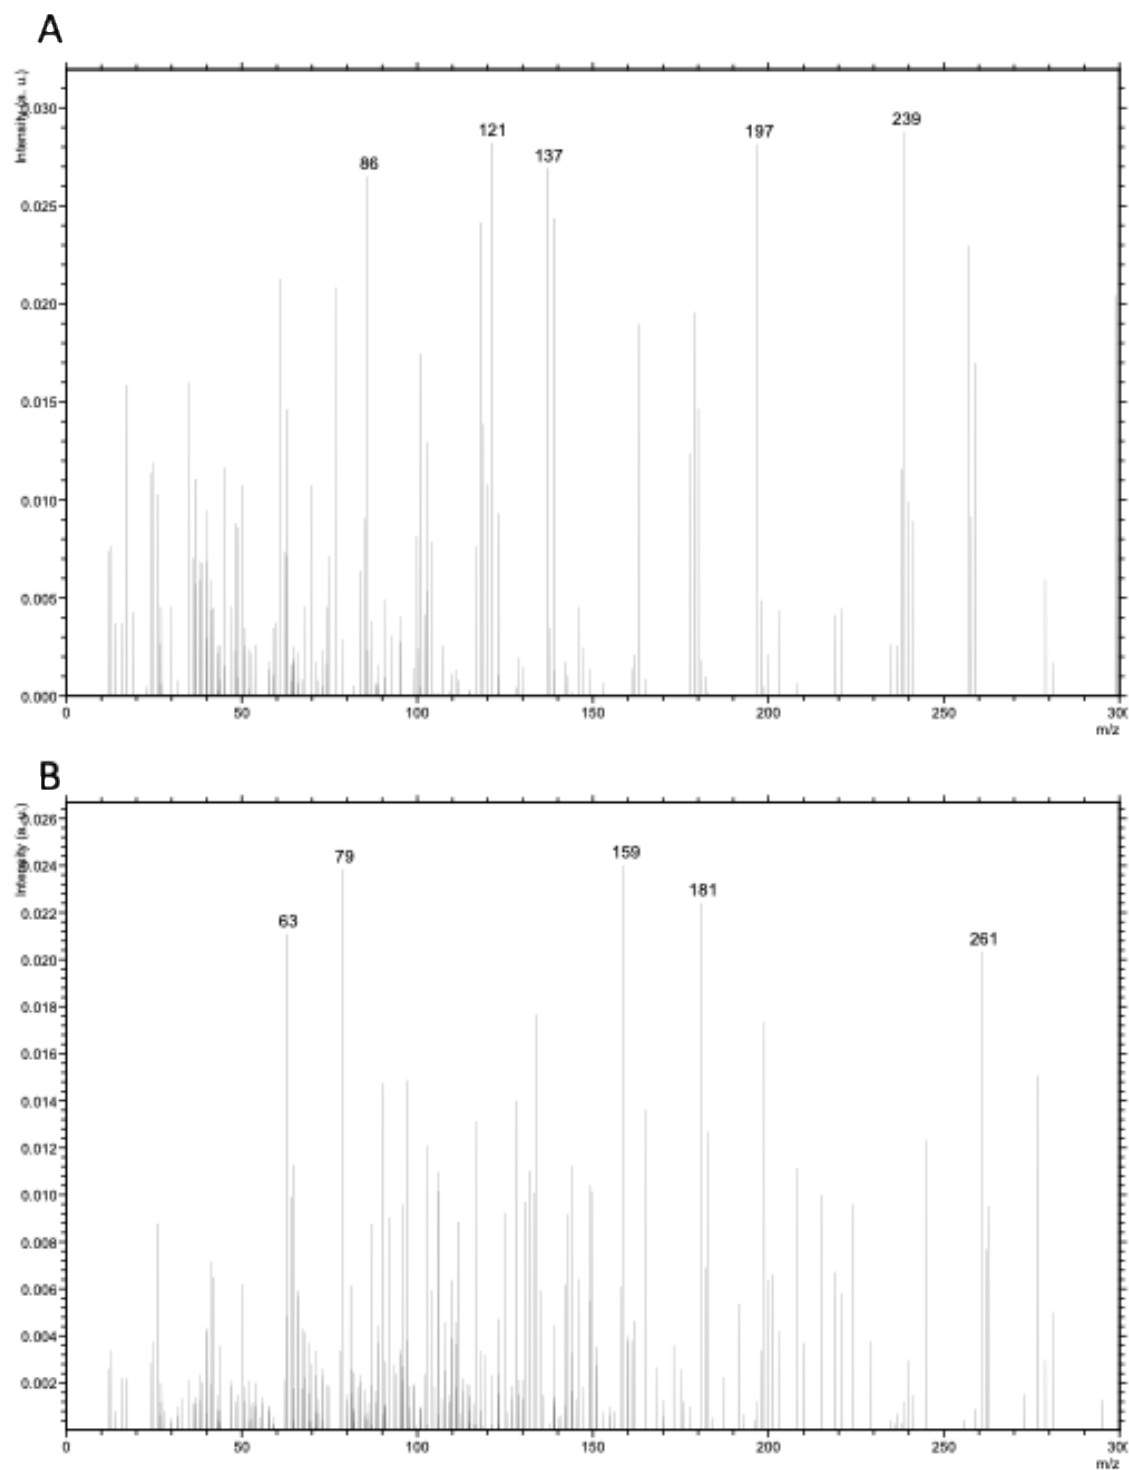

223 **Figure S14.** Replicate 2. The loading spectra from 6 factors of MCR analysis from negative  
224 ion image of the mixed untreated and surviving cancer cells sample from Figure S9. **(A)**  
225 factor 3 and **(B)** factor 4.

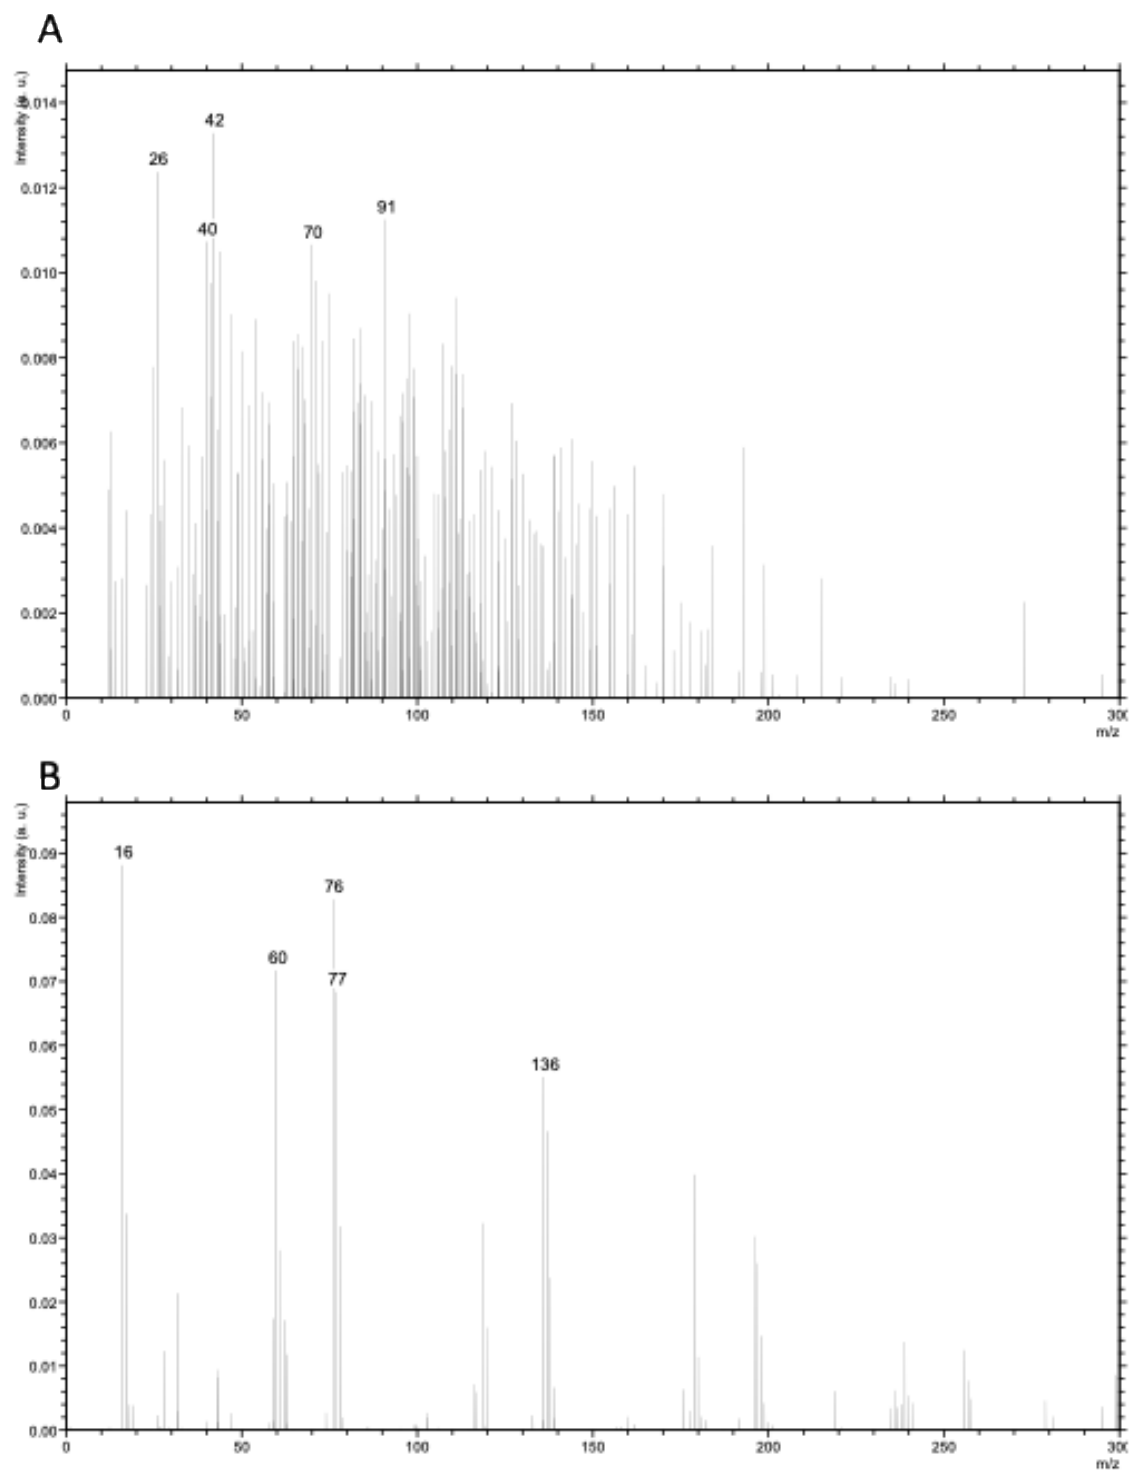

227 **Figure S15.** Replicate 2. The loading spectra from 6 factors of MCR analysis from negative  
228 ion image of the mixed untreated and surviving cancer cells sample from Figure S9. **(A)**  
229 factor 5 and **(B)** factor 6.

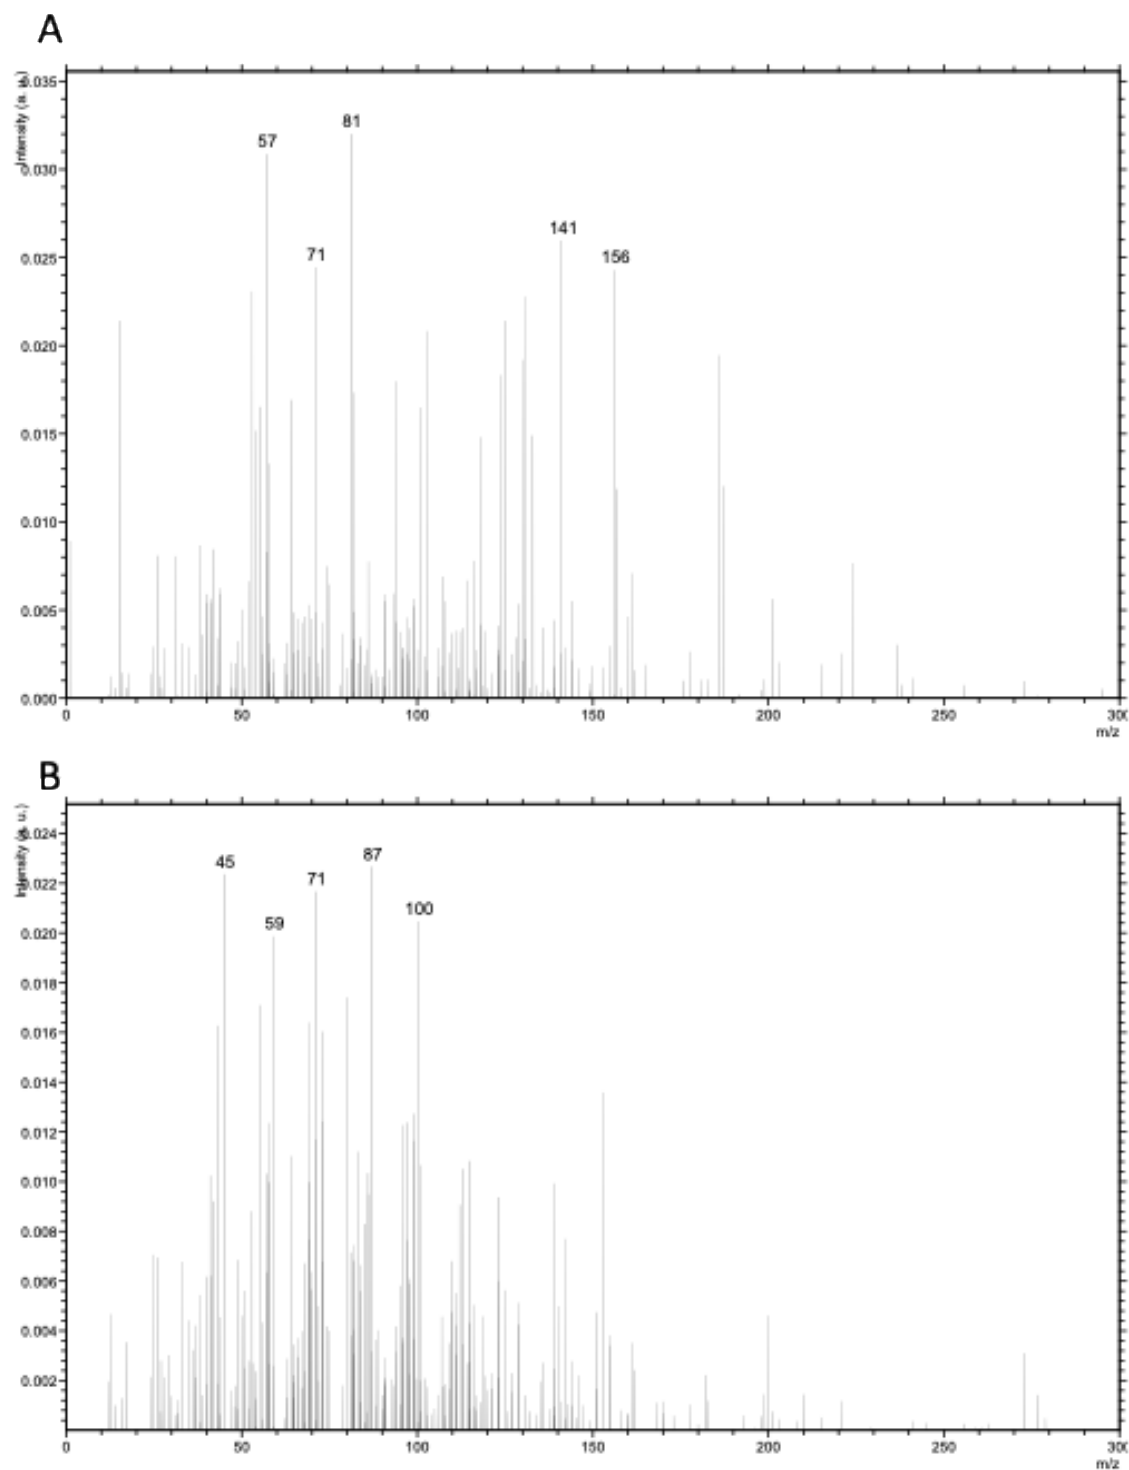

230  
231

232 **Figure S16.** Replicate 3. **(A)** Six factors (F1–F6) derived from PCA analysis of negative ion  
233 images for the mixed sample of untreated and surviving cancer cells. **(B)** Six factors (F1–F6)  
234 derived from MCR analysis of the same negative ion images. **(C)** PCA analysis, and **(D)** MCR  
235 analysis illustrating the overlay of cytoplasm (red), nucleus (blue), and lipid droplets (red).

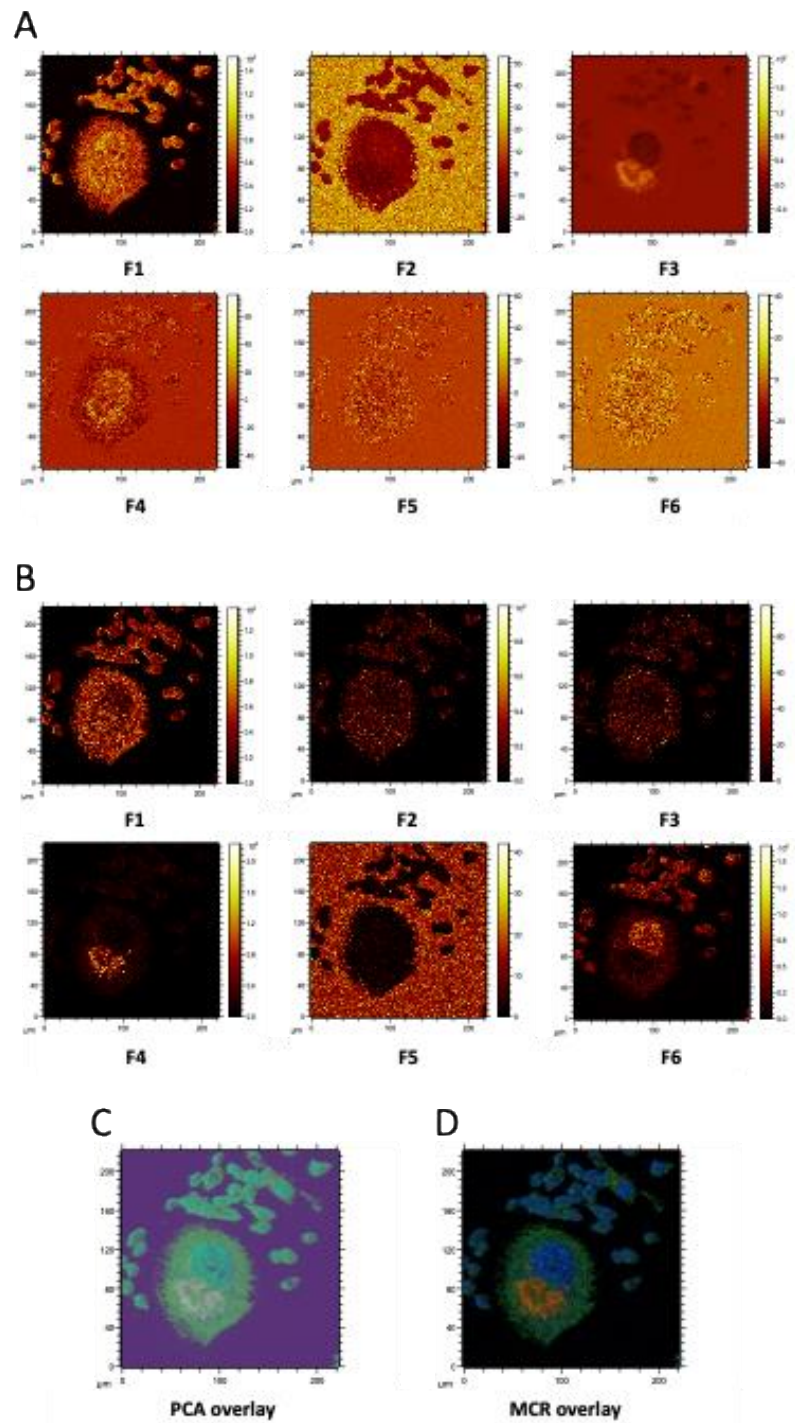

237 **Figure S17.** Replicate 3. The loading spectra from 6 factors of PCA analysis from negative ion  
238 image of the mixed untreated and surviving cancer cells sample from Figure S16. **(A)** factor 1  
239 and **(B)** factor 2.

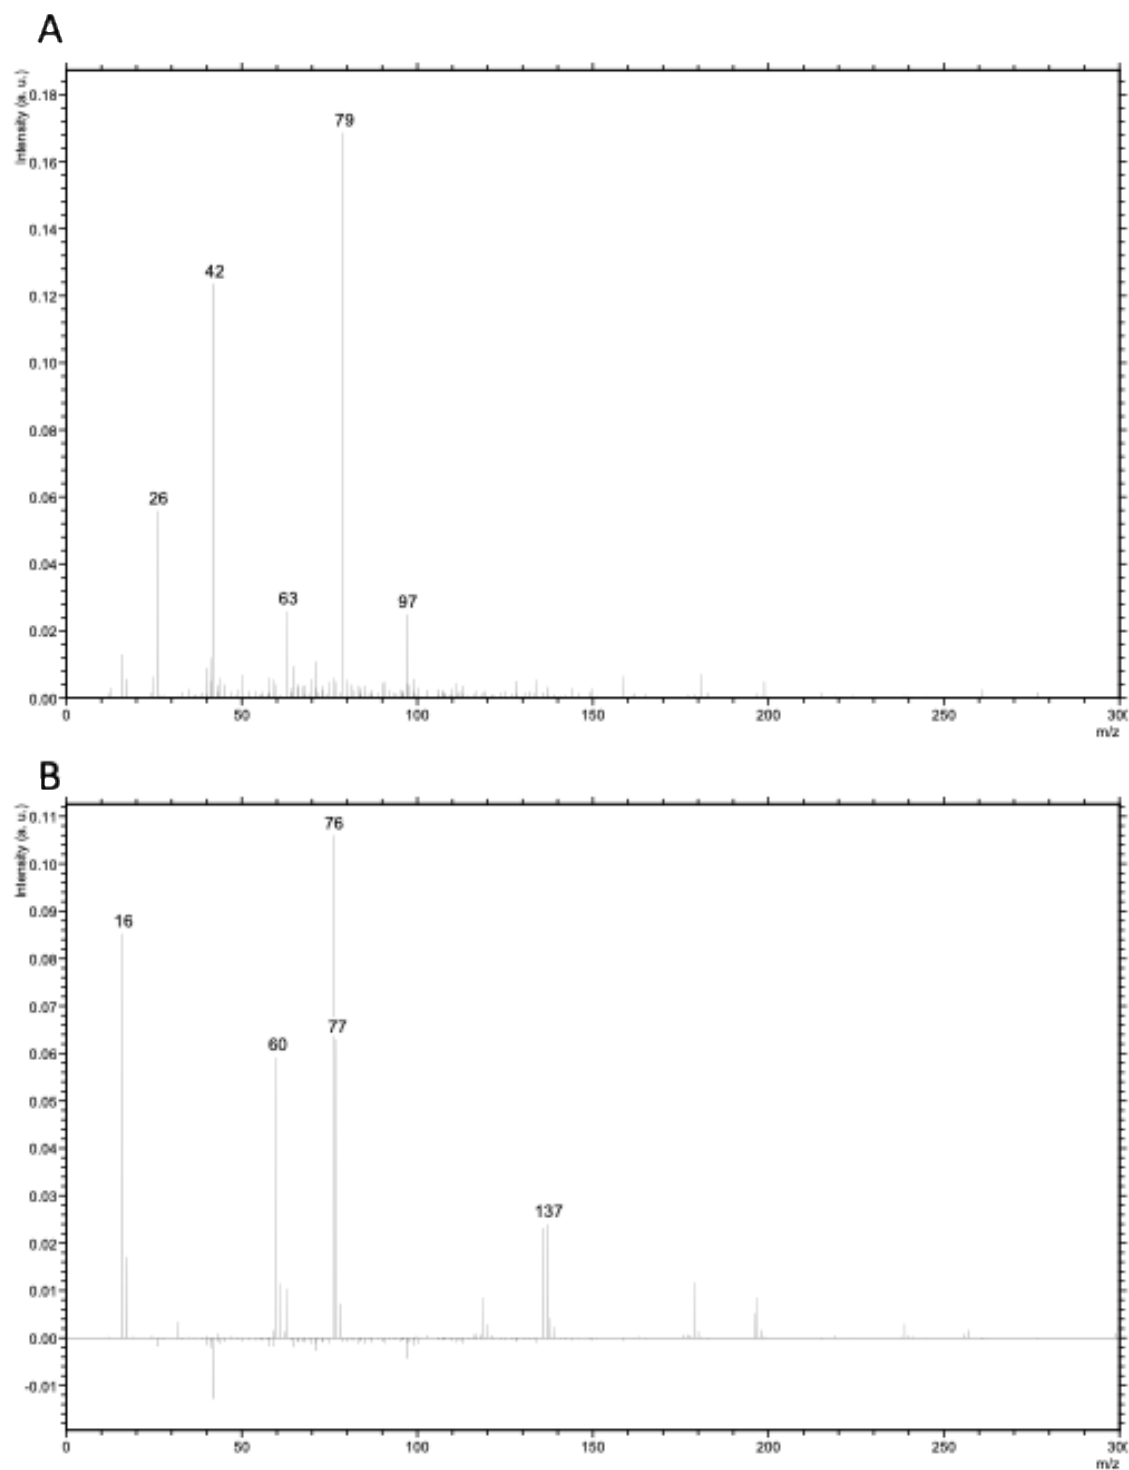



**Figure S18.** Replicate 3. The loading spectra from 6 factors of PCA analysis from negative ion image of the mixed untreated and surviving cancer cells sample from Figure S16. **(A)** factor 3 and **(B)** factor 4.



245 **Figure S19.** Replicate 3. The loading spectra from 6 factors of PCA analysis from negative ion  
246 image of the mixed untreated and surviving cancer cells sample from Figure S16. **(A)** factor 5  
247 and **(B)** factor 6.

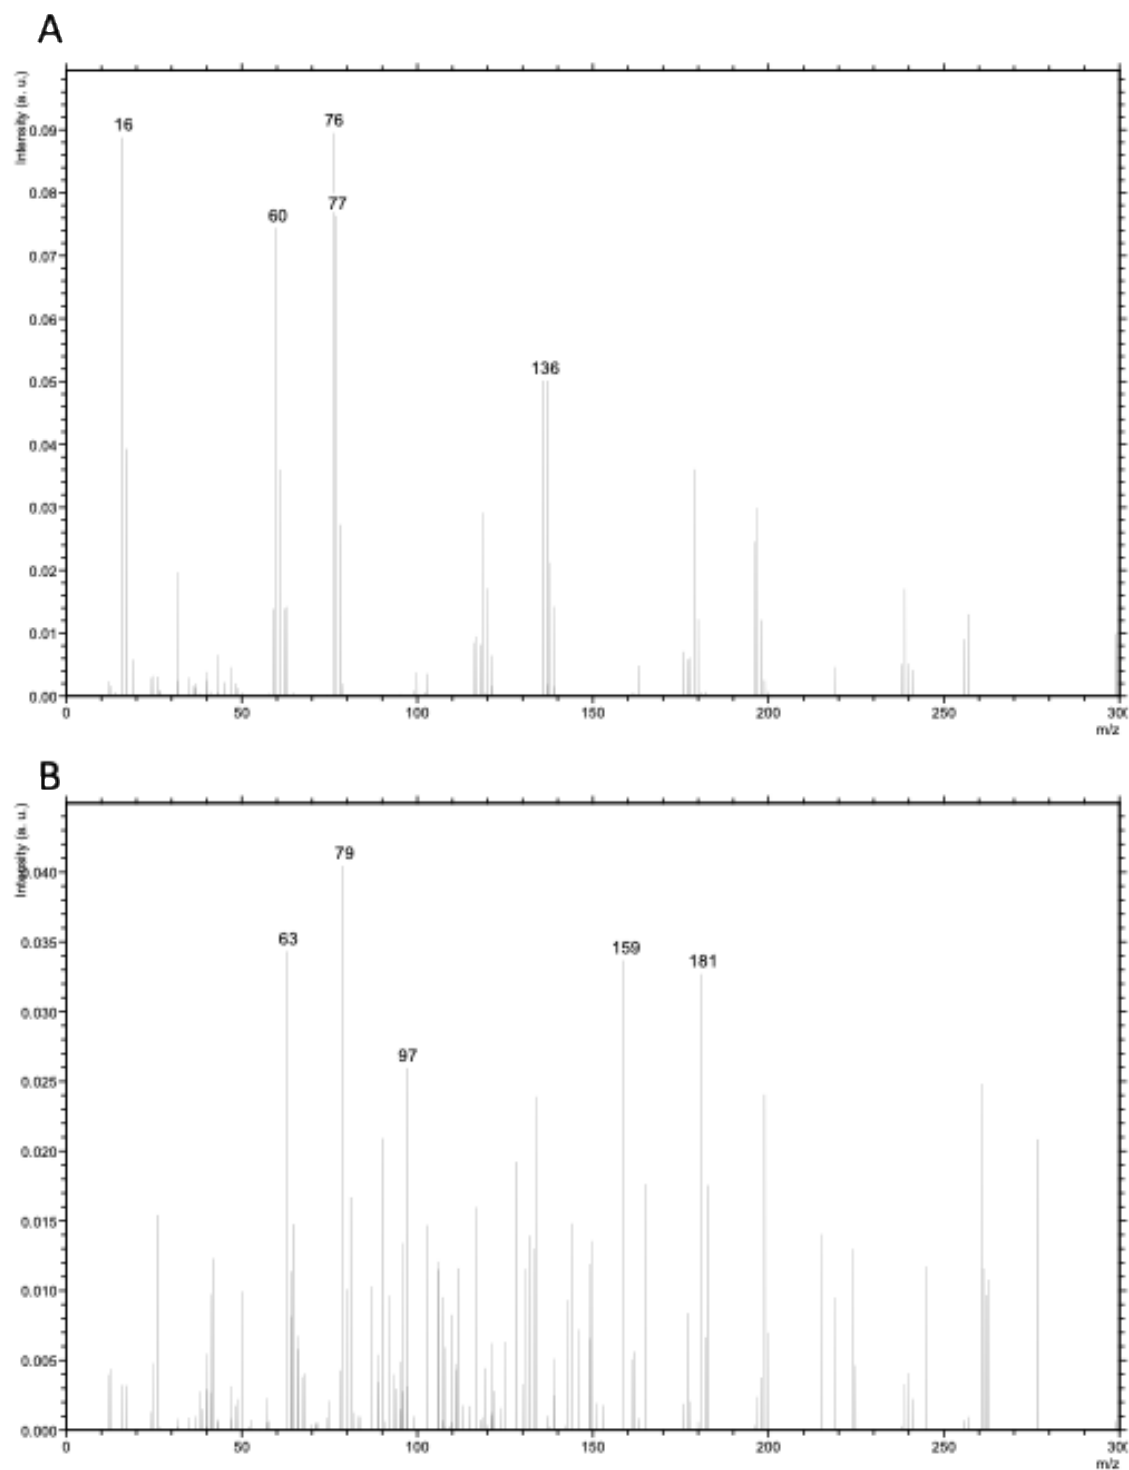

249 **Figure S20.** Replicate 3. The loading spectra from 6 factors of MCR analysis from negative  
250 ion image of the mixed untreated and surviving cancer cells sample from Figure S16. **(A)**  
251 factor 1 and **(B)** factor 2.

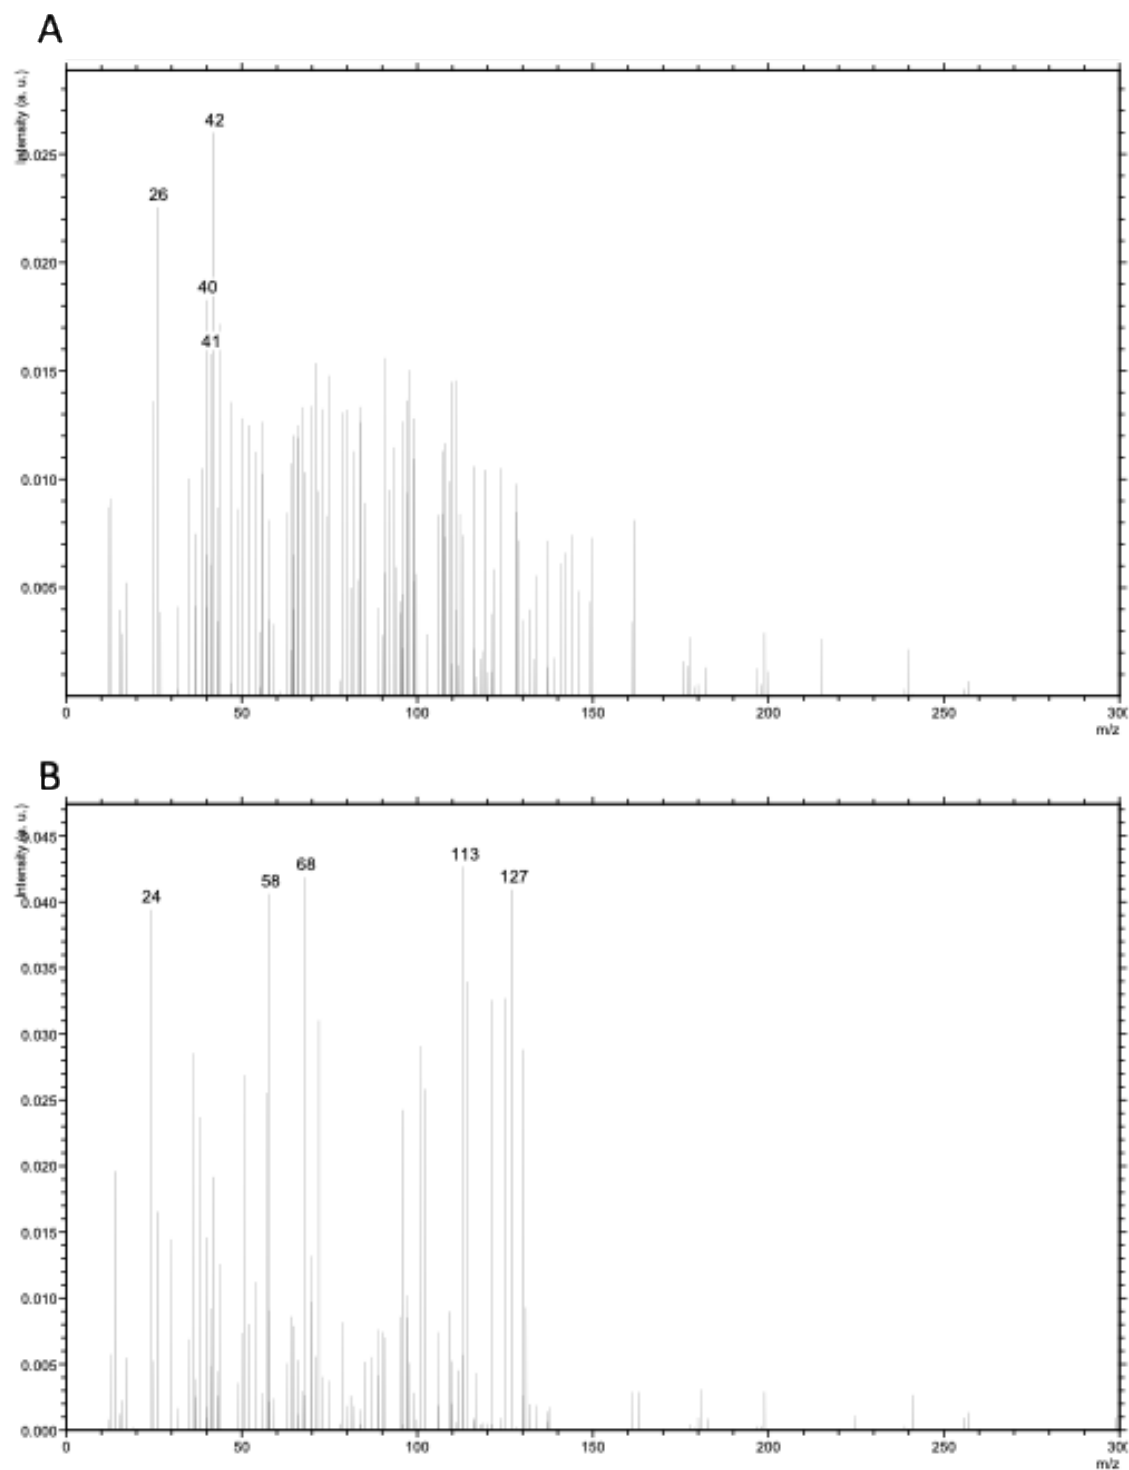

252

253 **Figure S21.** Replicate 3. The loading spectra from 6 factors of MCR analysis from negative  
254 ion image of the mixed untreated and surviving cancer cells sample from Figure S16. **(A)**  
255 factor 3 and **(B)** factor 4.

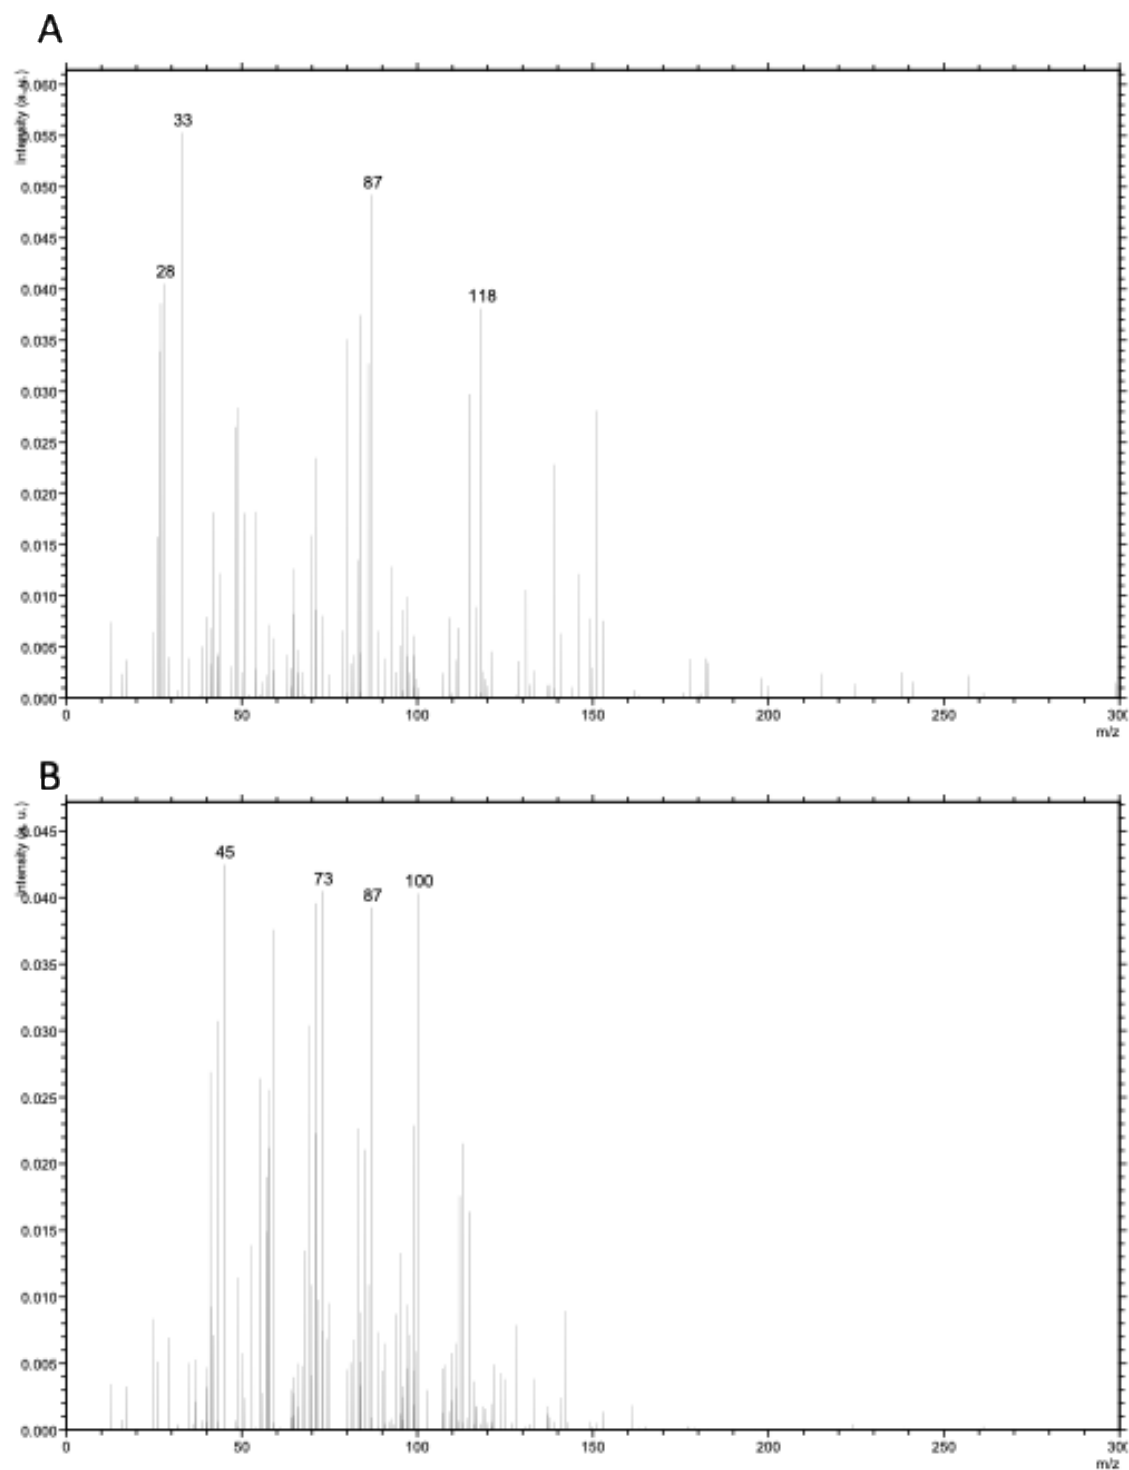

256

257 **Figure S22.** Replicate 3. The loading spectra from 6 factors of MCR analysis from negative  
258 ion image of the mixed untreated and surviving cancer cells sample from Figure S16. (A)  
259 factor 5 and (B) factor 6.

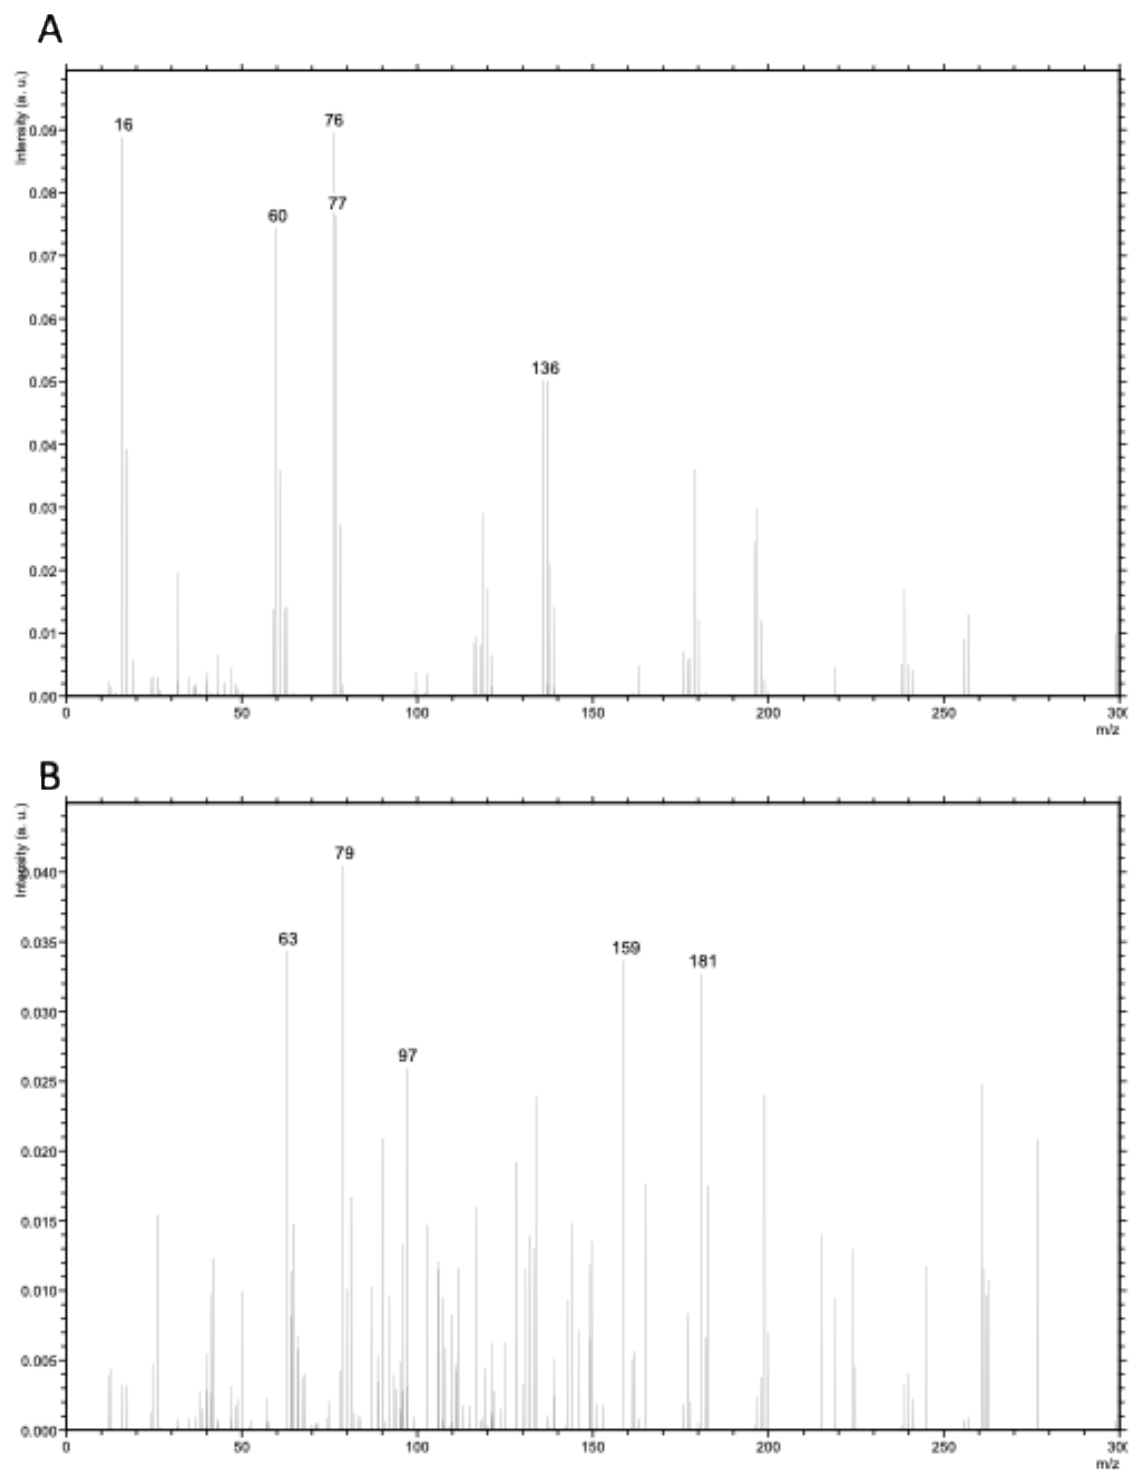

**Figure S23.** The measurement of oxygen consumption rate (OCR) of untreated and surviving cancer cells over time using Seahorse assay.

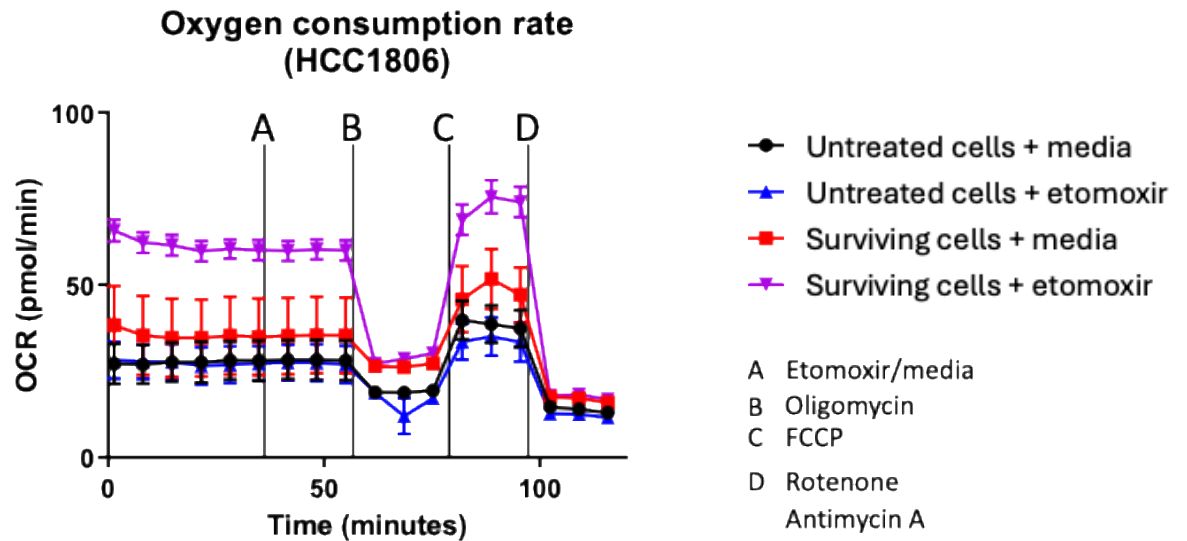

Supplement: d4ay02238f1.pdf [file d4ay02238f1.pdf]
